# **Data quantity is more important than its spatial bias for predictive species distribution modelling**

Willson Gaul<sup>1\*</sup>, Dinara Sadykova<sup>2</sup>, Hannah J. White<sup>1</sup>, Lupe León-Sánchez<sup>2</sup>, Paul Caplat<sup>2</sup>, Mark C. Emmerson<sup>2</sup>, Jon M. Yearsley<sup>1</sup>

<sup>1</sup> School of Biology & Environmental Sciences, Earth Institute, University College Dublin, Dublin, Ireland

<sup>2</sup> School of Biological Sciences, Queen's University Belfast, Belfast, UK

Corresponding Author:

Willson Gaul<sup>1</sup>

Email address: [willson.gaul@ucdconnect.ie](mailto:willson.gaul@ucdconnect.ie)

## 1 **ABSTRACT**

2 Biological records are often the data of choice for training predictive species distribution models  
3 (SDMs), but spatial sampling bias is pervasive in biological records data at multiple spatial scales  
4 and is thought to impair the performance of SDMs. We simulated presences and absences of  
5 virtual species as well as the process of recording these species to evaluate the effect on species  
6 distribution model prediction performance of 1) spatial bias in training data, 2) sample size (the  
7 average number of observations per species), and 3) the choice of species distribution modelling  
8 method. Our approach is novel in quantifying and applying real-world spatial sampling biases to  
9 simulated data. Spatial bias in training data decreased species distribution model prediction  
10 performance, but only when the bias was relatively strong. Sample size and the choice of modelling  
11 method were more important than spatial bias in determining the prediction performance of species  
12 distribution models.

13

## 14 **1 INTRODUCTION**

15 Biological records data (“what, where, when” records of species identity, location, and date of  
16 observation) often contain large amounts of data about species occurrences over large spatial areas  
17 (Isaac & Pocock, 2015). Knowing the geographic areas occupied by species is important for  
18 practical and fundamental research in a variety of disciplines. Epidemiologists use maps of  
19 predicted wildlife distributions to identify areas at high risk for wildlife-human transmission (Deka  
20 & Morshed, 2018; Redding et al., 2019). Land managers can use knowledge of species

21 distributions in spatial planning to minimize impacts on wildlife of new infrastructure (Dyer et al.  
22 2017; Newson et al., 2017). Because complete population censuses are not available for most  
23 species, species distribution models (SDMs) are often used to predict distributions of species using  
24 relatively sparse observations of species. Species observation data used to train SDMs must  
25 represent the study area, but when studies focus on scales of thousands (or tens- or hundreds of  
26 thousands) of square kilometers, it is difficult and often expensive to collect adequate data across  
27 the entire study extent. Spatially random or stratified sampling of species across large spatial areas  
28 is possible, and such surveys exist for some taxa including butterflies and birds (Uzarski et al.,  
29 2017), but such data are uncommon for most taxonomic groups (Isaac, van Strien, August, de  
30 Zeeuw, & Roy, 2014). More commonly, data are either spatially extensive but collected  
31 opportunistically (Amano, Lamming, & Sutherland, 2016), or are collected according to structured  
32 study designs but are more spatially limited.

33 Collecting biological records data is relatively cheap compared to collecting data directly as part  
34 of a research project (or at least the costs of collecting biological records are borne in large part by  
35 individual observers rather than by data analysts) (Carvell et al., 2016). However, there is an  
36 associated challenge because the analyst lacks control over where, when, and how data were  
37 collected. Many biases have been documented in biological records data, including temporal,  
38 spatial, and taxonomic biases (Boakes et al., 2010). Spatial sampling bias, in which some areas are  
39 sampled preferentially, is particularly pervasive at all scales and across taxonomic groups (Amano &  
40 Sutherland, 2013; Oliveira et al., 2016). Despite these biases, biological records are often used in  
41 species distribution modelling, either because no other data exists at the spatial scale of interest, or

42 because the modeler expects biological records to be more informative than data from more  
43 explicitly designed but smaller sampling schemes. Given the ubiquitous presence of spatial sampling  
44 bias in biological records data, it is important to know whether spatial bias in training data impedes  
45 the ability of SDMs to correctly model species distributions. Data collection efforts often face a  
46 practical trade-off between maximizing the overall quantity and the spatial evenness of new records.  
47 It would thus be useful to know whether the value of biological records for SDMs can best be  
48 improved by increasing the spatial evenness of recording (perhaps at the cost of the overall amount  
49 of new data that is added), or by increasing the overall amount of recording (even if new records are  
50 spatially biased).

51 Spatial sampling bias in biological records has similarities with sampling biases that have been  
52 investigated in other settings. The field of econometrics uses the term “sample selection bias” to  
53 refer to non-random sampling and has developed theory about when sampling bias is likely to bias  
54 analyses (Wooldridge, 2009). A key consideration in econometrics’ evaluations of sample selection  
55 bias is determining whether the inclusion of data in the sample depends on predictor variables that  
56 are included in the model (“exogenous” sample selection), or depends on the value of the response  
57 variable (“endogenous” sample selection), or both (Wooldridge, 2009). In ecology, Nakagawa  
58 (2015) similarly provides guidelines for assessing missing data in terms of whether data is missing  
59 randomly or systematically with respect to other variables (see also Gelman & Hill, 2006). In a  
60 machine learning context, Fan, Davidson, Zadrozny, & Yu (2005) investigated the effect on  
61 predictive models of sample selection bias in which sampling is associated with predictor variables -  
62 “exogenous sample selection” in the terms of Wooldridge (2009) and “missing at random” in the

63 terms of Nakagawa (2015) - and determined that most predictive models could be sensitive or  
64 insensitive to sampling bias depending on particular details of the dataset.

65 Biological records may have been collected with spatial sampling biases that are exogenous,  
66 endogenous, or both, and datasets may contain a mix of records collected with different types of  
67 bias. For example, when sampling intensity depends on proximity to roads (Oliveira et al., 2016),  
68 the sampling bias is exogenous because records arise from biased sampling that depends on an  
69 aspect of environmental space that can be included in models as a predictor variable. However,  
70 when a birder, for example, submits a record of an unusual bird from a location where they would  
71 not otherwise have submitted records, the bias is endogenous because the sampling location  
72 depends on the value of the response variable (species presence). In reality, the observer might have  
73 seen the unusual bird while driving along a road, so the sampling location depends on both the  
74 response variable (the presence of the bird) and predictor variables (proximity to the road). Most  
75 sampling biases occur on a continuum and are not unequivocally categorizable using any existing  
76 scheme (Nakagawa, 2015), making it difficult to describe exactly the biases in data or predict their  
77 effect on model performance.

78 Studies testing the impact of spatially biased training data on predictive SDMs have shown mixed  
79 results. Multiple studies using a pseudo-absence (or “presence/background”) approach with  
80 presence-only biological records have found that spatial bias in the data used to train SDMs  
81 decreases model prediction performance (Phillips et al., 2009; Barbet-Massin, Jiguet, Albert, &  
82 Thuiller, 2012; Stolar & Nielsen, 2015). However, it is not clear whether the effect of the spatial  
83 bias in those cases is due to the bias in the original data or the relative difference in bias between the

84 original data and pseudo-absences. In fact, Phillips et al. (2009) found that spatial bias in the  
85 presence records strongly reduced model performance when using a pseudo-absence approach but  
86 not when using a presence-absence approach. Some SDM methods tested by Barbet-Massin et al.  
87 (2012) appeared relatively unaffected by spatial sampling bias, while generalized linear models  
88 (GLMs) and generalized additive models (GAMs) appeared to be more strongly affected.  
89 Classification trees were sensitive to spatially biased training data in a study of lichen distributions  
90 (Edwards, Cutler, Zimmerman, Geiser, & Moisen, 2006). Thibaud, Petitpierre, Broennimann,  
91 Davison, & Guisan (2014) found that the effect of spatial sampling bias on SDM prediction  
92 performance depended on the SDM modelling method, and that the effect of spatial sampling bias  
93 was smaller than the effect of other factors, including sample size and choice of modelling method.  
94 Warton, Renner, & Ramp (2013) provided a method for correcting for spatially biased data when  
95 building SDMs, but found that the resulting improvement in model predictive performance was  
96 small. Because there is no clear guidance about when spatial bias in training data will or will not  
97 affect model predictions, tests of the observed effect of spatial biases common in biological records  
98 are important for determining whether those biases are likely to be problematic in practice.

99 The effect of spatial sampling bias on model predictions can be studied using either real or  
100 simulated data (Zurell et al., 2010). Using real data has the advantage that the biases in the data are,  
101 well, real. The spatial pattern, intensity, and correlation of sampling bias with environmental space  
102 are exactly of the type that analyses of real data must cope with. However, using real data has two  
103 disadvantages. First, the truth about the outcome being modeled (species presence or absence) is  
104 not completely known in the real world, making it impossible to evaluate how well models represent

105 the truth. Second, biases in real data are not limited to the biases under study – a study investigating  
106 the effect of exogenous spatial sampling bias will be unable to exclude from a real dataset records  
107 generated by endogenously biased sampling that depends on the values of the outcome variable.  
108 Simulation studies avoid both these problems. Because the investigator specifies the underlying  
109 pattern that is subsequently modeled, the truth is known exactly (even when realized instances of  
110 the simulation are generated with some stochasticity). The investigator also has direct control over  
111 which biases are introduced into a simulated dataset, and therefore can be more confident that any  
112 observed effects on predictions are due to the biases under investigation.

113 Spatial sampling bias can be introduced into either simulated or real data. This can be done using  
114 a parametric function that describes the bias (Isaac et al., 2014; Stolar & Nielsen, 2015; Thibaud et  
115 al., 2014) or by following a simplified ad-hoc rule (e.g. splitting the study region into distinct areas  
116 that are sampled with different intensities) (Phillips et al., 2009). However, these approaches may  
117 not adequately test the effect of spatial bias if the biases found in real biological records do not  
118 follow parametric functions or are more severe than artificial parametric or ad-hoc biases. We used  
119 observed sampling patterns from Irish biological records to sample simulated species distributions  
120 using realistic spatially biased sampling.

121 We used a virtual ecologist approach (Zurell et al., 2010) applied at the scale of Ireland to  
122 investigate the effect on the predictive performance of SDMs of 1) spatial sampling bias, 2) sample  
123 size (the average number of records per species), and 3) choice of SDM method. Our method for  
124 introducing sampling bias preserves real-world spatial patterns of sampling bias at multiple scales -  
125 not only are some individual locations more heavily sampled than others, but heavily sampled

126 locations are arranged in the landscape non-randomly in relation to each other and in relation to the  
127 landscape itself (i.e. some habitats are better sampled than others). We quantified the spatial  
128 sampling biases used in our study to enable comparison with biases in other datasets. Our approach  
129 is novel in applying real-world spatial sampling biases to simulated data.

## 130 **2 METHODS**

131 We assessed the ability of species distribution models to predict “virtual species” distributions  
132 (Leroy, Meynard, Bellard, & Courchamp, 2016; Zurell et al., 2010) when the models were trained  
133 with datasets with a range of spatial sampling biases and sample sizes. Virtual species distributions  
134 were produced by defining the responses of virtual species to environmental predictor variables  
135 (Table 1). Occurrence maps for virtual species were based on the actual values of the  
136 environmental predictor variables in 840 10 km x 10 km grid squares in Ireland (total area of study  
137 extent = 84,000 km<sup>2</sup>). We generated “virtual biological records” by sampling the community of  
138 virtual species in each grid square using sampling patterns taken from Irish biological records data.

### 139 **2.1 Environmental predictor variables**

140 We chose environmental predictor variables with a range of spatial patterns and scales of spatial  
141 auto-correlation (Table 1, Fig. S1). Because our species were simulated, predictor variables did not  
142 need to have biological relevance - by definition, the variables used to create the range of each  
143 virtual species were relevant to that species. The variety of spatial patterns in our predictor  
144 variables ensured that our virtual species distributions were determined by variables with a variety  
145 of spatial patterns, as is the case for real biological species. We used climate variables (which show



146 relatively strong spatial clustering, Table 1) from the E-OBS European Climate Assessment and  
147 Dataset EU project (Haylock et al., 2008; van den Besselaar, Haylock, van der Schrier, & Klein  
148 Tank, 2011; <http://www.ecad.eu/download/ensembles/downloadchunks.php>). We calculated the  
149 proportion of each grid square covered by different land cover variables (which show less spatial  
150 clustering than climate variables, Table 1) from the CORINE Land Cover database (CORINE,  
151 2012). We calculated the average elevation within each grid square by interpolation using ordinary  
152 kriging from the ETOPO1 Global Relief Model (Amante & Eakins, 2009;  
153 [https://www.ngdc.noaa.gov/mgg/global/relief/ETOPO1/data/ice\\_surface/grid\\_registered/netcdf/](https://www.ngdc.noaa.gov/mgg/global/relief/ETOPO1/data/ice_surface/grid_registered/netcdf/)  
154 [accessed 8 May 2019]).

155 Spatial data were prepared using the ‘sf’, ‘sp’, ‘raster’, ‘fasterize’, ‘rgdal’, ‘gstat’, and ‘tidyverse’  
156 packages in R version 3.6 (Bivand, Keitt, & Rowlingson, 2018; Gräler, Pebesma, & Heuvelink,  
157 2016; Hijmans 2018; Pebesma, 2018; R Core Team, 2018; Ross, 2018; Wickham, 2017).

## 158 **2.2 Species occurrence data**

159 We downloaded observations of species across the island of Ireland for the years 1970 to 2014  
160 from the British Bryological Society for bryophytes (accessed through NBN Atlas website,  
161 <https://nbnatlas.org> [downloaded 24 August 2017]) and from the Irish National Biodiversity Data  
162 Centre (NBDC) for moths, dragonflies, butterflies, and birds (<http://www.biodiversityireland.ie/>  
163 [downloaded 6 October 2017]). The data contained presence-only records of species, with the date  
164 and location of the observation, an anonymized observer identifier, and a taxonomic group label that  
165 indicated species commonly sampled together. The taxonomic group label often corresponded to  
166 order (e.g. odonata), but sometimes represented a class (e.g. Aves) or other categorization that

167 better grouped species according to sampling techniques. Locations of records were provided as  
168 either 1 km<sup>2</sup> or 100 km<sup>2</sup> (10 km x 10 km) grid squares, but we used 10 km x 10 km grid squares in  
169 all analyses in order to retain the majority of the data. Within each taxonomic group, we grouped  
170 records into sampling events, where a sampling event was defined as all records with an identical  
171 combination of recording date, location, and observer.

### 172 **2.3 Spatial sampling patterns in Irish species occurrence data**

173 For each taxonomic group, we quantified sampling effort in each grid square as the proportion of  
174 all records coming from the grid square. We used grid squares along the coast even though these  
175 cells contain less terrestrial habitat than inland grid squares. We measured the spatial evenness of  
176 sampling effort among locations by using Simpson evenness (Magurran & McGill, 2011) to  
177 compare the number of observation records in grid squares.

### 178 **2.4 Data simulation**

#### 179 *2.4.1 Simulating species distributions*

180 We simulated and sampled virtual species distributions using the ‘virtualspecies’ package (Leroy  
181 et al., 2016) in R. The probability of occurrence of each virtual species  $i$  in each grid square  $j$  was a  
182 logistic function of two variables and their quadratic terms:

$$183 \quad \text{logit}(p_{ij}) = \alpha_i + \sum_{k=1}^2 (\beta_{1ki} V_{kj} + \beta_{2ki} V_{kj}^2)$$

184 where  $p_{ij}$  is the probability that virtual species  $i$  occurs in grid square  $j$ ,  $V_{kj}$  indicates the value of the  
185  $k^{\text{th}}$  predictor variable in grid cell  $j$ , and the  $\alpha$  and  $\beta$  terms are the species-specific coefficients

186 defining the response of the virtual species to the environment. The predictor variables were  
187 derived by randomly selecting, for each virtual species, seven of the ten environmental variables to  
188 use as drivers of occurrence (only seven of the ten variables were used for each species so that not  
189 all species responded to all the same environmental variables). Selected environmental variables  
190 were centered, scaled, and summarized using principal components analysis with the ‘ade4’ R  
191 package (Dray & Dufour, 2007). The first two principal components were used to determine the  
192 distribution of the species, rather than using the seven original environmental variables, to avoid  
193 producing virtual species with optimal niches in conditions that do not exist (e.g. a virtual species  
194 with an occurrence optimum at warm temperature and high elevation) (Leroy et al., 2016).  
195 Coefficients specifying virtual species’ responses were chosen such that the theoretical prevalence of  
196 each virtual species (the sum of the probabilities of presence in each grid square divided by the  
197 number of grid squares) was greater than 0.01, equivalent to the virtual species occurring in at least  
198 eight of the 840 grid squares in our study extent.

#### 199 2.4.2 *Realized species communities*

200 A single realized distribution of each virtual species  $i$  was created by randomly generating a  
201 “presence” (1) or “absence” (0) for each grid square  $j$  by drawing a value from a binomial  
202 distribution with probability  $p_{ij}$ . We simulated two different types of virtual species communities, a  
203 small community containing 34 virtual species (the number of recorded odonata species in Ireland)  
204 and a large community containing 1268 virtual species (the number of recorded bryophyte species  
205 in Ireland). Results were qualitatively similar for the large- and small-community simulations after  
206 fitting two of the SDM methods (GLMs and inverse distance-weighted interpolation). We therefore

207 tested the third SDM method, boosted regression trees, only on the large-community simulation.

208 Below we refer to the large community simulation except where explicitly stated. For small

209 community simulation results see supplementary materials (S2).

### 210 2.4.3 *Simulating sampling with spatial bias*

211 Virtual biological records data were generated by sampling the realized species communities in

212 “sampling events” at different locations to produce spatially explicit species checklists (Fig. S3).

213 Spatial sampling locations were chosen based on spatial sampling patterns from three Irish

214 biological records datasets with different spatial sampling biases: birds (low spatial sampling bias),

215 butterflies (median spatial sampling bias), and moths (severe spatial sampling bias). This gave four

216 spatial sampling “templates”, including the case of no spatial sampling bias (Fig. 1).

217 To make sampling patterns comparable between datasets with different sample sizes, we

218 calculated sampling weights for each grid square in each empirical dataset by counting the number

219 of records in each grid square and dividing by the maximum number of records in any grid square.

220 This produced a relative sampling weight for each grid square, where the most heavily sampled cell

221 had a weight of one and other cells had weights below one (Fig. 1).

222 We tested six different sample sizes, defined as the mean number of records per species (number

223 of records per species = 2, 5, 10, 50, 100, and 200).

224 To generate virtual biological records from the virtual species communities, we randomly selected

225 a grid square, using selection probabilities from one of the four spatial-bias templates. Within each

226 grid square that was selected for sampling, we 1) generated a list of virtual species that were present

227 in the grid square; 2) defined the probability of observing each of the present species based on the  
228 species' prevalence in the entire study extent (so that common species had a higher probability of  
229 being recorded when present), and 3) drew observations with replacement from the list of present  
230 species. The number of records to generate during a sampling event (i.e. the checklist length) was  
231 drawn randomly with replacement from the sampling event checklist lengths from real bryophyte  
232 data (for the large community simulation) or dragonfly data (for the small community simulation).  
233 We continued this sampling process until we had accumulated the desired number of records.

## 234 **2.5 Species distribution modeling**

235 We tested three different SDM modeling techniques: generalized linear models (GLMs) (Hosmer  
236 & Lemeshow, 2000), boosted regression trees (Elith, Leathwick, & Hastie, 2008; Friedman, 2001),  
237 and inverse distance-weighted interpolation (Cressie, 1991). These represent distinct types of  
238 methods used for SDMs, including linear (GLM) and machine learning (boosted regression tree)  
239 methods, and a spatial interpolation method (inverse distance-weighted interpolation) that does not  
240 include information from environmental covariates. For all methods, the modeled quantity was the  
241 probability of the focal virtual species being recorded on a checklist. We modeled each species  
242 individually as a function of five environmental predictor variables, chosen from the ten possible  
243 predictor variables listed in Table 1. Using only five of the ten possible predictor variables simulated  
244 a real-world situation in which the factors that influence species distributions are not entirely known.  
245 We treated the list of records from each sampling event as a complete record of that sampling  
246 event, and treated the absence of species from a sampling event checklist as non-detection data for  
247 those species (Fig. S3, Kéry et al., 2010). Thus, we explicitly used a detection/non-detection rather

248 than a presence-only modeling framework. Many species distribution modelling techniques  
249 commonly used with presence-only data require the generation of artificial “pseudo-absences” in  
250 order to fit models (Barbet-Massin et al. 2012). However, the spatial bias of pseudo-absences  
251 should match the spatial bias of presence data, which can be difficult to achieve, especially when  
252 spatial biases are difficult to model. We avoided the use of pseudo-absences by analyzing checklists  
253 of species, on which every species is either detected or not detected (Johnston et al. 2020, Kéry et  
254 al. 2010). Using non-detection data inferred from records of other similar species provides clarity  
255 about what is being modeled (i.e. the probability of a species being recorded on a checklist, not the  
256 probability of occurrence) and ensures that the sampling biases are the same for detections and non-  
257 detections, which may reduce the effect of sampling bias (Barbet-Massin et al. 2012, Johnston et al.  
258 2020, Phillips et al. 2009).

259 We modeled 110 randomly selected virtual species from the 1268 virtual species in the large  
260 community simulation. The number of virtual species modeled was a compromise between high  
261 replication and computation limitations, but testing 110 virtual species should provide enough  
262 replication for robust conclusions. We fitted each type of SDM once to each combination of virtual  
263 species, sample size, and spatial sampling bias. Thus, the sample size for our study – the number of  
264 SDM prediction performance values that we used to assess the effects of spatial sampling bias,  
265 sample size, and SDM method - was 110 prediction performance values for each combination of  
266 SDM method, sample size, and spatial sampling bias (one prediction performance value for each of  
267 the 110 selected virtual species). Replication in our study came not from repeatedly fitting models  
268 to different randomly generated sets of presences and absences of the same virtual species, but

269 rather from fitting each model once to data for many different virtual species, all generated using  
270 parameters randomly drawn from the same distributions. However, the same 110 virtual species  
271 were used for each combination of SDM method, spatial sampling bias, and sample size, ensuring  
272 that all comparisons were based on the same underlying task (i.e. modelling the same true species  
273 distributions).

274 Models were trained and evaluated using five-fold spatial block cross-validation (Roberts et al.,  
275 2017) that partitioned the study extent into spatial blocks of 100 km x 100 km and allocated each  
276 block to one of five cross-validation partitions. Models were trained five times, each time leaving  
277 out data from one of the five partitions. We only attempted to fit models if there were more than  
278 five positive detections in the training data (i.e. within the four training folds during cross-  
279 validation), because we did not expect any of the SDM methods we tested to be able to produce  
280 meaningful models when there were fewer than six detections of the focal species. Prediction  
281 performance of models was evaluated using the true simulated species presence or absence in each  
282 grid cell not included in the spatial extent of the training partitions (Fig. 2). Thus, evaluation data  
283 was spatially even and the number of evaluation points stayed constant even as the sample size and  
284 spatial bias of training data changed (Fig. 2). Prediction performance was evaluated using the area  
285 under the receiver operating characteristic curve (AUC) (Hosmer & Lemeshow, 2000) to measure  
286 models' ability to accurately distinguish presences and absences, and root mean squared error  
287 (RMSE) to compare predicted probabilities of species being recorded during a sampling event to  
288 the true probability of occurrence defined by the simulation.

289 For GLMs, we used logistic regression ('glm' function) with a binomial error distribution and logit  
290 link. Quadratic terms were fitted, but we did not fit interactions between variables. We controlled  
291 overfitting by limiting the number of terms in GLMs such that there were at least 10 detections or  
292 non-detections (whichever was smaller) in the training data for each non-intercept term in the  
293 model. For example, if the training data had 35 detections, we limited the GLM to using only three  
294 terms plus an intercept. We tested all possible models from an intercept-only model up to models  
295 with the maximum number of terms permitted by our "10 detections per term" rule of thumb. If a  
296 quadratic term was included in a model, we also included the 1<sup>st</sup> degree term. For generating  
297 predictions, we used the model that gave the lowest AIC based on the training data.

298 Boosted regression trees were trained using 'gbm.step' in the 'dismo' package (Greenwell,  
299 Boehmke, & Cunningham, 2018; Hijmans, Phillips, Leathwick, & Elith, 2017). Unlike GLMs,  
300 boosted regression trees do not require the modeler to specify interactions between variables,  
301 because the trees will discover and model interactions if they are present. The tree complexity  
302 specified by the modeler controls the maximum interaction order that the models are permitted to  
303 fit, and therefore can be used to prevent overfitting. Elith, Leathwick and Hastie (2008) found  
304 relatively little harm in using higher tree complexities, even with small sample sizes, presumably  
305 because the models did not fit complex interactions that were not present, even when the model was  
306 given freedom to do so. Nevertheless, we tested tree complexities of two and five, to build models  
307 that allowed interactions between up to two and up to five variables, respectively. Smaller learning  
308 rates are generally preferred because they result in better predictive performance but using smaller  
309 learning rates comes at the cost of higher computation and memory requirements (Elith, Leathwick,



310 and Hastie 2008). We therefore used learning rates small enough to grow at least 1000 trees  
311 (following Elith, Leathwick, and Hastie 2008), but large enough to keep models below an upper  
312 limit of 30,000 trees because of computation time limitations. We used `gbm.step` to determine the  
313 optimal number of trees for each model, based on monitoring the change in 10-fold cross-validated  
314 error rate as trees were added to the model (Hijmans, Phillips, Leathwick, & Elith, 2017). We  
315 explored whether the upper limit of 30,000 trees affected our conclusions by looking at graphs of  
316 the frequency distribution of number of trees used, and graphs of prediction performance as a  
317 function of the number of trees. Details of the procedure used to select the tree complexity,  
318 learning rate, and number of trees are in the supplementary materials (S2) and in our R code, which  
319 is available on GitHub (<https://zenodo.org/badge/latestdoi/229083757>).

320 Inverse distance-weighted interpolation was implemented using ‘`gstat`’ (Gräler et al., 2016;  
321 Pebesma, 2004). We tuned parameters of the inverse distance-weighted interpolation model based  
322 on prediction error (details in S2 and at <https://zenodo.org/badge/latestdoi/229083757>).

323 After models were fitted, we looked for evidence of overfitting and assessed whether the number  
324 of positive detections of the focal species in the test dataset affected prediction performance  
325 metrics. Details of the graphs used to assess overfitting and the effect of species prevalence on  
326 performance metrics are in the supplementary materials (S2). All analyses used R version 3.6.0 (R  
327 Core Team, 2020), and code is available on GitHub  
328 (<https://zenodo.org/badge/latestdoi/229083757>).

## 329 **2.6 Analyzing effects of sampling bias and sample size**

330 We modeled the predictive performance (AUC and RMSE) of SDMs as a function of spatial  
331 sampling bias, sample size (average number of observations per species), and SDM method.  
332 Modelling was done using boosted regression trees ('gbm.step' in the 'dismo' package) (Greenwell et  
333 al., 2018; Hijmans et al., 2017). To assess whether species prevalence (the commonness or rarity of  
334 a species in the study extent) and/or the number of detections in the test dataset affected our  
335 evaluations of model performance, we graphed AUC and RMSE as a function of species prevalence  
336 for all models (Fig. S4), and graphed AUC as a function of the number of detections in the test  
337 dataset for each SDM modelling method separately (Fig. S5). Because RMSE showed a strong  
338 trend with species prevalence (Fig. S4), we included species prevalence in the boosted regression  
339 tree models of RMSE. AUC showed decreasing variability as prevalence increased, but did not  
340 show a clear trend that was not associated with the decrease in variability (Fig. S4). AUC did not  
341 show any trend with the number of detections in the test dataset (Fig. S4). Because AUC did not  
342 seem to be strongly affected by species prevalence or the number of detection in the test data, we  
343 did not include species prevalence in our models assessing AUC. Variable importance was assessed  
344 based on the reduction in squared error attributed to each variable in boosted regression tree models  
345 (Friedman, 2001). We also assessed the effect of spatial sampling bias and sample size of training  
346 data on the number of species for which models could be fitted within the computational time and  
347 memory constraints of this study (S2).

## 348 **3 RESULTS**

349 Simulated species showed a variety of plausible distribution patterns (Fig. 3) and prevalences (Fig.  
350 S6), including species with north/south distribution gradients and distributions that followed  
351 geographic features such as the coastline (Fig. 3).

352 Sample size (the mean number of observations per species) was the most important variable for  
353 explaining variations in prediction performance of SDMs, followed by the choice of SDM method  
354 and spatial sampling bias (Table 2). Simpson evenness values for spatial sampling evenness of the  
355 template datasets are in Table 3.

### 356 **3.1 Number of species successfully modeled**

357 The number of species for which models fitted successfully increased as sample size increased and  
358 spatial bias decreased (Fig. 4). For GLMs and inverse distance-weighted interpolation, model fitting  
359 was largely successful when datasets had more than 100 records per species, except when spatial  
360 bias was severe (Fig. 4). Boosted regression trees failed to fit models for some species even with  
361 relatively large amounts of data (e.g. an average 200 records per species), and models fit less  
362 frequently when data had median or severe spatial biases (Fig. 4). The effect of spatial bias on the  
363 number of species for which models fitted was small, but was slightly greater for boosted regression  
364 trees than for other SDM modelling methods (Fig. 4).

### 365 **3.2 Predictive performance of SDMs**

366 The amount of spatial bias in training data was less important than sample size and choice of  
367 SDM method in predicting the performance of SDMs (Table 2, Table S7, Table S8). AUC for

368 predictive SDMs increased with the average number of records per species and with decreasing  
369 spatial bias in the training data when using all SDM methods (Fig. 5, Fig. 6). Root mean squared  
370 error (RMSE) was largely unaffected by spatial sampling bias (Fig. 7, Fig. S6, Table S8). Species  
371 prevalence (the number of grid squares occupied by a species) and the number of detections in the  
372 test dataset both had negligible effects on the average value of AUC, though they did affect the  
373 variability of AUC (Fig. S4, Fig. S5). Species prevalence strongly affected the expected value of  
374 RMSE, with RMSE increasing with species prevalence (Table S8, Fig. S4).

### 375 *3.2.1 Effect of sample size*

376 Sample size (average number of records per species) was the most important variable for  
377 predicting species distribution model prediction performance (Table 2). AUC improved with  
378 increasing average number of records per species for all SDM methods, and the improvement in  
379 AUC decelerated as the number of records per species increased (Fig. 5, Fig. 8).

### 380 *3.2.2 Effect of spatial bias*

381 Higher levels of spatial sampling bias generally reduced AUC, but the size of this effect was small  
382 for the low level of bias (Fig. 5). SDMs built with GLMs showed the biggest difference in  
383 prediction performance between models trained with unbiased data and models trained with data  
384 showing median spatial bias (reduction in expected AUC of 0.037 when using an average of 200  
385 records per species, Fig. 5). Other SDM methods showed less difference in AUC between models  
386 trained with unbiased data and models trained with data containing median spatial bias (decrease in  
387 expected AUC of 0.033 for boosted regression trees and 0.030 for inverse distance-weighted  
388 interpolation when using an average of 200 records per species).

389 The AUC for inverse distance-weighted interpolation models trained with unbiased data was  
390 generally higher than the AUC for GLMs and boosted regression trees trained with severely biased  
391 data, but lower than the AUC for GLMs and boosted regression trees trained with data with median  
392 spatial bias for any given sample size (Fig. 5, Fig. 6).

#### 393 **4 DISCUSSION**

394 Both sample size (the average number of observations per species) and choice of modelling  
395 method were more important than the spatial bias of training data for determining model prediction  
396 performance. This is in line with the results of Thibaud et al. (2014). However, Thibaud et al.  
397 (2014) simulated spatial sampling bias by defining sampling probability as a linear function of  
398 distance from the nearest road. In contrast, our study used observed spatial sampling patterns from  
399 real biological records datasets. Our results therefore provide a more direct confirmation that spatial  
400 biases of the type and intensity found in real datasets are not as important as other factors in  
401 determining SDM prediction performance.

402 While spatial bias was not the most important factor determining SDM prediction performance,  
403 spatial sampling bias did affect model prediction performance when spatial bias was relatively  
404 strong. The limited effect of spatial bias on SDMs that we observed is similar to other findings that  
405 have shown spatial sampling bias to have a small effect on model performance (Thibaud et al.,  
406 2014; Warton et al., 2013) or to affect only some SDM methods (Barbet-Massin et al., 2012).  
407 Given Fan et al.'s (2005) conclusion that most types of predictive models can be either sensitive or  
408 insensitive to sample selection bias in training data, depending on the specific datasets, it seems  
409 unlikely that a broad conclusion about the effect of spatial sampling bias on species distribution

410 models in all cases is possible. It therefore remains important to test the effect of spatial bias on  
411 SDMs using data that match as closely as possible the data used for different SDM applications.  
412 Our study used spatial biases and the spatially explicit environmental data representative of data  
413 likely to be used in SDMs using biological records in Ireland. Our conclusions therefore apply most  
414 directly to applications of SDMs using Irish biological records, and may not be generalizable to  
415 other geographic locations, or for species within Ireland that do not respond to the environmental  
416 predictor variables used in this study. However, our results strengthen a growing body of literature  
417 that suggests that spatial sampling bias is rarely the most important issue in determining SDM  
418 prediction performance. In particular, the choice of modelling method may often have more impact  
419 on SDM prediction performance than a variety of other factors (Barbet-Massin et al., 2012;  
420 Fernandes, Scherrer, & Guisan, 2018).

421 Training data with low spatial sampling bias produced species distribution models that performed  
422 nearly as well as models trained with unbiased data. Prediction performance was poor when models  
423 were trained with small sample sizes, regardless of the spatial bias in training data. Similarly,  
424 model performance increased quickly with sample size when sample size was small, even when the  
425 data had severe spatial bias. This suggests that, for taxonomic groups with relatively few records per  
426 species, the usefulness of the data for predictive SDMs can be improved by increasing sample size,  
427 even if additional data collection is spatially biased. In contrast, for taxonomic groups for which  
428 biological records datasets already have a high average number of records per species (e.g. birds and  
429 butterflies which both have an average of over 2000 records per species in Ireland) further

430 improvements in SDM prediction performance will likely require increasing the spatial evenness of  
431 data (Fig. 8).

432 The objective of our SDMs was to fill in gaps in species distribution knowledge within the spatial  
433 and environmental conditions of the island of Ireland, an area of about 84,000 km<sup>2</sup>. Our results  
434 may not generalize to larger spatial scales or to cases in which the goal of SDMs is uncovering  
435 species' entire fundamental environmental niche or determining the environmental factors most  
436 strongly influencing distributions. The spatial scope of our SDMs is sensible both from an  
437 ecological and applied standpoint, because the island of Ireland is a geographically delimited  
438 ecological unit, and because decision making about species conservation and management often  
439 happens within political units (e.g. nations, states, or counties) that cover only a portion of species'  
440 spatial and environmental distributions. Our results suggest that, when the goal of predictive SDMs  
441 is to fill in data gaps within a scale of tens of thousands of square kilometers (e.g. a national scale in  
442 the case of Ireland), spatial sampling bias was less important in determining model performance  
443 than the total amount of data and the SDM modelling method.

444 GLMs had the best prediction performance of the four SDM methods we tested, even though they  
445 were more affected by spatial bias than were other methods. The high performance of GLMs  
446 relative to other modelling methods in this study agrees with the simulation results of Thibaud et al.  
447 (2014) and Fernandes et al. (2018). However, as in both those studies, we generated virtual species  
448 distributions according to a linear model, so it is possible that the good performance of GLMs is  
449 due to the model having the same functional form as the "true" species responses. In real  
450 applications, it is unlikely that the functional form of the model will exactly match the form of the

451 true species responses. Indeed, the species distribution modelling literature has many examples of  
452 different modelling methods performing best in different studies, suggesting that no modelling  
453 method consistently outperforms others (Bahn & McGill, 2007; Breiner, Nobis, Bergamini, &  
454 Guisan, 2018; Cutler et al., 2007; Elith et al., 2006; Elith & Graham 2009).

455 Boosted regression trees' prediction performance was slightly less affected by spatial bias than  
456 GLMs', and prediction performance of both methods was similar when trained with large, spatially  
457 biased datasets. But boosted regression trees failed to fit models more often than did GLMs,  
458 especially when sample sizes were smaller, which may make them inferior to other modelling  
459 methods for small datasets, at least within the computational resource limits we faced. We cannot  
460 rule out the possibility that the performance of boosted regression trees would improve if they were  
461 trained with a smaller learning rate and permitted to grow more than 30,000 trees. However, most  
462 users of SDMs will face some computational resource limitations. We permitted boosted regression  
463 trees to grow up to 30,000 trees, which is well above the rule-of-thumb guidelines given by Elith,  
464 Leathwick, and Hastie (2008).

465 In this study, we introduced spatial bias specifically into the training data and tested model  
466 performance using spatially even evaluation data. However, spatial bias can also occur in evaluation  
467 data and may affect the reliability of model evaluations (Fink et al., 2010). When using real  
468 biological records datasets, it is likely that both model training and evaluation will use spatially  
469 biased data, making it difficult to dis-entangle whether observed effects of spatially biased data on  
470 prediction performance are due to the influence of biased data in the model training step or in the  
471 model evaluation step. We evaluated models on spatially even data (which is easy using simulated



472 data but would be more difficult or impossible when using real data), so the observed effects of  
473 spatially biased data on prediction performance in our study can be attributed to the effect of biased  
474 data on model training. All of the SDM methods we used involve some kind of model evaluation as  
475 part of the model training process, either inherent in the model fitting or introduced by our  
476 implementation. For example, with our GLMs we introduced a model evaluation step when we  
477 chose the combination of predictor variables that gave the model with the lowest AIC on training  
478 data. The final GLM models were therefore based on variables that had been selected by evaluation  
479 on spatially biased data. For both GLMs and inverse distance-weighted interpolation, it is possible  
480 that using unbiased data in the evaluations during model selection would have led to different final  
481 models. Therefore, the observed effect of the spatial bias in this study could be due to how biased  
482 data affects the actual fitting of each individual model, or to how the biased data affects the  
483 evaluation step used to select which fitted model to use for predictions. Tree-based methods,  
484 including boosted regression trees, select which values of predictor variables to split at and/or which  
485 predictor variables to use at each node based on how much those splits improve some measure of  
486 performance on the training data (Elith et al., 2008; Hastie et al., 2009). Thus, evaluation on  
487 potentially spatially biased training data is inherent in fitting tree models.

488 Fink et al. (2010) provided a method for correcting spatial bias in evaluation data to reduce the  
489 effect of spatial bias on model evaluation, but they did not explicitly address spatially biased data in  
490 model training. Our results showed that spatially biased data can impact model training (at least  
491 when the spatial bias is relatively strong). Investigating the effect of spatially biased data on the  
492 evaluation that takes place as part of model training (e.g. during variable selection or parameter

493 tuning) may be a worthwhile path for future research. It may be possible to use a method like that  
494 proposed by Fink et al. (2010) to correct spatial bias during the evaluation that takes place within  
495 the model training process. This may reduce the effect of spatially biased training data on model  
496 performance that we observed.

497 Our use of Simpson evenness to measure spatial sampling evenness allows the spatial sampling  
498 biases tested in this study to be compared to spatial sampling patterns in existing datasets. Because  
499 we calculated spatial sampling evenness using the number of records in each grid square relative to  
500 the entire study extent, our measures of spatial sampling evenness confound species richness and  
501 sampling effort. Using the number of checklists (or sampling events) rather than the number of  
502 records would alleviate this problem. However, records in our datasets were aggregated over long  
503 time periods so that the records appear to have the same date, location, and observer, even when  
504 records arose from different sampling events. For example, records from vascular plant and bird  
505 atlases have been incorporated into the NBDC database with all the atlas records from a grid square  
506 being assigned the same date (the publication date of the atlas), even though records were collected  
507 over multiple years. Many of these atlas grid square “checklists” are hundreds (or thousands!) of  
508 records long, with repeat observations of common species. The total number of records therefore  
509 better represents the many years and many unique days of sampling in heavily sampled grid squares  
510 for NBDC datasets, despite the fact that spatially uneven species richness will cause the number of  
511 records to be higher in some grid squares than others, even when sampling effort is equal.

## 512 **5 CONCLUSION**

513 We found that spatial sampling bias in training data affected species distribution model prediction  
514 performance when the spatial bias was relatively strong, but that sample size and the choice of  
515 modelling method were more important than spatial bias in determining model prediction  
516 performance. This study adds to a body of literature suggesting that prediction performance of  
517 species distribution models is less affected by spatial sampling bias in training data than by other  
518 factors including modelling method and sample size.

## 519 **6 ACKNOWLEDGMENTS**

520 We thank Tomás Murray and the Irish National Biodiversity Data Centre (NBDC) for providing  
521 and answering questions about the biological records data, and we thank the many citizen scientists  
522 who collected and contributed their data to the NBDC. This publication emanated from research  
523 supported in part by a grant from Science Foundation Ireland under grant number 15/IA/2881.  
524 This work used the ResearchIT Sonic cluster funded by UCD IT Services and the Research Office.  
525 This research used CORINE data made available with funding by the European Union.

526

## 527 **REFERENCES**

528 Amano, T., & Sutherland, W. J. (2013). Four barriers to the global understanding of biodiversity  
529 conservation: Wealth, language, geographical location and security. *Proceedings of the Royal*  
530 *Society B: Biological Sciences*, 280, 20122649.

- 531 Amano, T., Lamming, J. D. L., & Sutherland, W. J. (2016). Spatial gaps in global biodiversity  
532 information and the role of citizen science. *BioScience*, 66, 393–400.
- 533 Amante, C., & Eakins, B. W. (2009). ETOPO1 1 arc-minute global relief model: Procedures, data  
534 sources and analysis. NOAA Technical Memorandum NESDIS NGDC-24. National Geophysical  
535 Data Center, NOAA. doi: 10.7289/V5C8276M [accessed 8 May 2019].
- 536 Bahn, V., & McGill, B. J. (2007). Can niche-based distribution models outperform spatial  
537 interpolation? *Global Ecology and Biogeography*, 16, 733–742.
- 538 Barbet-Massin, M., Jiguet, F., Albert, C. H., & Thuiller, W. (2012). Selecting pseudo-absences for  
539 species distribution models: How, where and how many? *Methods in Ecology and Evolution*, 3,  
540 327–338.
- 541 Bivand, R., Keitt, T., & Rowlingson, B. (2018). *rgdal: Bindings for the 'geospatial' data abstraction*  
542 *library*. R package versions 1.3-9 and 1.4-4.
- 543 Boakes, E. H., McGowan, P. J. K., Fuller, R. A., Chang-qing, D., Clark, N. E., O'Connor, K., &  
544 Mace, G. M. (2010). Distorted views of biodiversity: Spatial and temporal bias in species  
545 occurrence data. *PLoS Biology*, 8, e1000385.
- 546 Breiman, L. (2001). Random forests. *Machine Learning*, 45, 5–32.
- 547 Breiner, F. T., Nobis, M. P., Bergamini, A., & Guisan, A. (2018). Optimizing ensembles of small  
548 models for predicting the distribution of species with few occurrences. *Methods in Ecology and*  
549 *Evolution*, 9, 802–808.
- 550 Carvell, C., Isaac, N. J. B., Jitlal, M., Peyton, J., Powney, G. D., Roy, D. B., ... Roy, H. E. (2016).  
551 *Design and testing of a national pollinator and pollination monitoring framework*. Final summary

552 report to the Department for Environment, Food and Rural Affairs (Defra), Scottish Government;  
553 Welsh Government: Project WC1101.

554 CORINE land cover database. (2012). Version 18. © European Union, Copernicus Land  
555 Monitoring Service 2016, European Environment Agency (EEA). Retrieved from  
556 [https://www.eea.europa.eu/ds\\_resolveuid/ecb838dabf4849838ba5f3dc81ca6b0e](https://www.eea.europa.eu/ds_resolveuid/ecb838dabf4849838ba5f3dc81ca6b0e) [8 Aug 2016].

557 Cressie, N. A. C. (1991). *Statistics for spatial data*. New York: John Wiley & Sons, Inc.

558 Cutler, D. R., Edwards, T. C., Beard, K. H., Cutler, A., Hess, K. T., Gibson, J., & Lawler, J. J.  
559 (2007). Random forests for classification in ecology. *Ecology*, 88, 2783–2792.

560 Deka, M., & Morshed, N. (2018). Mapping disease transmission risk of Nipah Virus in South and  
561 Southeast Asia. *Tropical Medicine and Infectious Disease*, 3, 57.

562 Dray, S., & Dufour, A. (2007). The ade4 package: Implementing the duality diagram for ecologists.  
563 *Journal of Statistical Software*, 22, 1–20.

564 Dyer, R. J., Gillings, S., Pywell, R. F., Fox, R., Roy, D. B., & Oliver, T. H. (2017). Developing a  
565 biodiversity-based indicator for large-scale environmental assessment: A case study of proposed  
566 shale gas extraction sites in Britain. *Journal of Applied Ecology*, 54, 872–882.

567 Edwards, T. C., Cutler, D. R., Zimmermann, N. E., Geiser, L., & Moisen, G. G. (2006). Effects of  
568 sample survey design on the accuracy of classification tree models in species distribution models.  
569 *Ecological Modelling*, 199, 132–141.

570 Elith, J., & Graham, C. H. (2009). Do they? How do they? Why do they differ? On finding reasons  
571 for differing performances of species distribution models. *Ecography*, 32, 66–77.

- 572 Elith, J., Graham, C. H., Anderson, R. P., Dudík, M., Ferrier, S., Guisan, A., ... Zimmermann, N.  
573 E. (2006). Novel methods improve prediction of species' distributions from occurrence data.  
574 *Ecography*, 29, 129–151.
- 575 Elith, J., Leathwick, J. R., & Hastie, T. (2008). A working guide to boosted regression trees.  
576 *Journal of Animal Ecology*, 77, 802–813.
- 577 Fan, W., Davidson, I., Zadrozny, B., & Yu, P. S. (2005). *An improved categorization of classifier's*  
578 *sensitivity on sample selection bias*. In Fifth IEEE International Conference on Data Mining  
579 (ICDM'05), Houston, TX: IEEE.
- 580 Fernandes, R. F., Scherrer, D., & Guisan, A. (2018). How much should one sample to accurately  
581 predict the distribution of species assemblages? A virtual community approach. *Ecological*  
582 *Informatics*, 48, 125–134.
- 583 Fink, D., Hochachka, W. M., Zuckerberg, B., Winkler, D. W., Shaby, B., Munson, M. A., ...  
584 Kelling, S. (2010). Spatiotemporal exploratory models for broad-scale survey data. *Ecological*  
585 *Applications*, 20, 2131–2147.
- 586 Friedman, J. H. (2001). Greedy function approximation: A gradient boosting machine. *The Annals*  
587 *of Statistics*, 29, 1189–1232.
- 588 Gelman, A., & Hill, J. (2006). Data analysis using regression and multilevel/hierarchical models  
589 (Analytical Methods for Social Research). Cambridge: Cambridge University Press.
- 590 Gräler, B., Pebesma, E., & Heuvelink, G. (2016). Spatio-temporal interpolation using gstat. *The R*  
591 *Journal*, 8, 204–218.
- 592 Greenwell, B., Boehmke, B., Cunningham, J., & GBM Developers. (2018). *gbm: Generalized*  
593 *boosted regression models*. R package version 2.1.4.

- 594 Hastie, T., Tibshirani, R., & Friedman, J. (2009). *The elements of statistical learning: Data mining,*  
595 *inference and prediction* (2nd ed.). New York: Springer.
- 596 Haylock, M. R., Hofstra, N., Klein Tank, A. M. G., Klok, E. J., Jones, P. D., & New, M. (2008). A  
597 European daily high-resolution gridded data set of surface temperature and precipitation for  
598 1950-2006. *Journal of Geophysical Research*, 113, D20119.
- 599 Hijmans, R. J. (2018). *raster: Geographic data analysis and modeling*. R package versions 2.8-4 and  
600 2.9-23.
- 601 Hijmans, R. J., Phillips, S., Leathwick, J., & Elith, J. (2017). *dismo: Species distribution modeling*.  
602 R package version 1.1-4.
- 603 Hosmer, D. W., & Lemeshow, S. (2000). *Applied logistic regression* (2nd ed). New York: Wiley.
- 604 Isaac, N. J. B., and Pocock, M. J. O. (2015). Bias and information in biological records. *Biological*  
605 *Journal of the Linnean Society*, 115, 522–531.
- 606 Isaac, N. J. B., van Strien, A. J., August, T. A., de Zeeuw, M. P., & Roy, D. B. (2014). Statistics for  
607 citizen science: Extracting signals of change from noisy ecological data. *Methods in Ecology and*  
608 *Evolution*, 5, 1052–1060.
- 609 Johnston, A., Moran, N., Musgrove, A., Fink, D., & Baillie, S. R. (2020). Estimating species  
610 distributions from spatially biased citizen science data. *Ecological Modelling*, 422, 108927.  
611 <https://doi.org/10.1016/j.ecolmodel.2019.108927>
- 612 Kéry, M., Royle, A., Schmid, H., Schaub, M., Volet, B., Häfliger, G., & Zbinden, N. (2010). Site-  
613 occupancy distribution modeling to correct population-trend estimates derived from opportunistic  
614 observations. *Conservation Biology*, 24, 1388-1397.

- 615 Leroy, B., Meynard, C. N., Bellard, C., & Courchamp, F. (2016). virtualspecies, an R package to  
616 generate virtual species distributions. *Ecography*, 39, 599–607.
- 617 Liaw, A., & Wiener, M. (2002). Classification and regression by randomForest. *R News*, 2, 18–22.
- 618 Magurran, A. E., & McGill, B. J. (Eds.). (2011). *Biological diversity: Frontiers in measurement and*  
619 *assessment*. Oxford: Oxford University Press.
- 620 Nakagawa, S. (2015). Missing data: mechanisms, methods, and messages. In G. A. Fox, S.  
621 Negrette-Yankelevich, & V. J. Sosa (Eds.), *Ecological statistics: Contemporary theory and*  
622 *application* (First Ed., pp. 81–105). Oxford: Oxford University Press.
- 623 Newson, S. E., Evans, H. E., Gillings, S., Jarrett, D., Raynor, R., & Wilson, M. W. (2017). Large-  
624 scale citizen science improves assessment of risk posed by wind farms to bats in southern  
625 Scotland. *Biological Conservation*, 215, 61–71.
- 626 Oliveira, U., Paglia, A. P., Brescovit, A. D., de Carvalho, C. J. B., Silva, D. P., Rezende, D. T., ...  
627 Santos, A. J. (2016). The strong influence of collection bias on biodiversity knowledge shortfalls  
628 of Brazilian terrestrial biodiversity. *Diversity and Distributions*, 22, 1232–1244.
- 629 Pebesma, E. (2018). Simple features for R: Standardized support for spatial vector data. *The R*  
630 *Journal*, 10, 439–446.
- 631 Pebesma, E. J. (2004). Multivariable geostatistics in S: The gstat package. *Computers &*  
632 *Geosciences*, 30, 683–691.
- 633 Phillips, S. J., Dudík, M., Elith, J., Graham, C. H., Lehmann, A., Leathwick, J., & Ferrier, S.  
634 (2009). Sample selection bias and presence-only distribution models: Implications for  
635 background and pseudo-absence data. *Ecological Applications*, 19, 181–197.



- 636 R Core Team (2020). *R: A language and environment for statistical computing*. Vienna, Austria: R  
637 Foundation for Statistical Computing.
- 638 Redding, D. W., Atkinson, P. M., Cunningham, A. A., Lo Iacono, G., Moses, L. M., Wood, J. L.  
639 N., & Jones, K. E. (2019). Impacts of environmental and socio-economic factors on emergence  
640 and epidemic potential of Ebola in Africa. *Nature Communications*, 10, 4531.
- 641 Roberts, D. R., Bahn, V., Ciuti, S., Boyce, M. S., Elith, J., Guillera-Arroita, G., ... Dormann, C. F.  
642 (2017). Cross-validation strategies for data with temporal, spatial, hierarchical, or phylogenetic  
643 structure. *Ecography*, 40, 913–929.
- 644 Ross, N. (2018). *fasterize: Fast polygon to raster conversion*. R package version 1.0.0.
- 645 Stolar, J., & Nielsen, S. E. (2015). Accounting for spatially biased sampling effort in presence-only  
646 species distribution modelling. *Diversity and Distributions*, 21, 595–608.
- 647 Thibaud, E., Petitpierre, B., Broennimann, O., Davison, A. C., & Guisan, A. (2014). Measuring the  
648 relative effect of factors affecting species distribution model predictions. *Methods in Ecology and*  
649 *Evolution*, 5, 947–955.
- 650 Uzarski, D. G., Brady, V. J., Cooper, M. J., Wilcox, D. A., Albert, D. A., Axler, R. P., ...  
651 Schneider, J. P. (2017). Standardized measures of coastal wetland condition: Implementation at a  
652 Laurentian Great Lakes basin-wide scale. *Wetlands*, 37, 15-32.
- 653 van den Besselaar, E. J. M., Haylock, M. R., van der Schrier, G., & Klein Tank, A. M. G. (2011).  
654 A European daily high-resolution observational gridded data set of sea level pressure. *Journal of*  
655 *Geophysical Research Atmospheres*, 116, D11110.
- 656 Warton, D. I., Renner, I. W., & Ramp, D. (2013). Model-based control of observer bias for the  
657 analysis of presence-only data in ecology. *PLoS ONE*, 8, e79168.

- 658 Wickham, H. (2017). *tidyverse: Easily install and load the 'tidyverse'*. R package version 1.2.1.
- 659 Wooldridge, J. M. (2009). *Introductory econometrics: A modern approach* (4<sup>th</sup> ed.). Mason, OH:  
660 South-Western.
- 661 Zurell, D., Berger, U., Cabral, J. S., Jeltsch, F., Meynard, C. N., Münkemüller, T., ... Grimm, V.  
662 (2010). The virtual ecologist approach: Simulating data and observers. *Oikos*, 119, 622–635.
- 663
- 664

665 **Fig. 1. Spatial sampling patterns from Irish biological records.** Spatial sampling patterns from  
666 Irish biological records were used as templates to create virtual species records data with varying  
667 amounts of spatial bias. Darker shades indicate higher relative probability of sampling from a grid  
668 square compared to other grid squares within in the same template; overall sampling effort is the  
669 same for each panel (A) through (E). The most heavily sampled grid square in each spatial bias  
670 template has a relative recording effort of one, while a grid square with half as many records as the  
671 most heavily sampled square has a relative recording effort of 0.5. Spatial sampling patterns  
672 derived from datasets for different taxonomic groups were: (A) no bias (even probability of  
673 sampling from every grid square), (B) low bias (based on bird data), (C) median bias (based on  
674 butterflies), and (D) severe bias (based on moths).

675

676 **Fig. 2. Species distribution model training and testing process for a single cross-validation**  
677 **fold.** The true virtual species distribution (A, presences shown in dark green, absences in light  
678 grey) was sampled to produce virtual biological records with a range of sample sizes and spatial  
679 biases, including no bias (B) and median bias (C). Orange points in (B) and (C) show checklists on  
680 which the species was recorded, black points show checklists on which the species was not recorded  
681 (i.e. non-detection points). Species distribution models were fit using five-fold spatial block cross  
682 validation, in which data from about 80% of the spatial area was used to train models (light grey  
683 background in B and C). Data from the remaining spatial areas (dark grey background in B and C)  
684 was set aside for model evaluation. Model evaluation tested the ability of species distribution  
685 models to predict the true presence (orange dots) or absence (black dots) of the species in each grid  
686 cell within the evaluation areas (D). Model evaluation therefore used spatially even data with the

687 same number of evaluation points (D) regardless of the sample size and spatial bias of training data  
688 (B and C).

689

690 **Fig. 3. The true distributions of four example simulated species.** Simulated species showed a  
691 range of plausible distributions with a range of prevalences, including (A) common widespread  
692 species, (B) rare species mostly limited to north-western coastal sites, (C) species with a north/south  
693 gradient in occurrence, and (D) common species that are absent from southern sites.

694

695 **Fig. 4. The number of virtual species successfully modeled.** The number of virtual species (out  
696 of 110 total species chosen for modelling from the large community simulation) for which species  
697 distribution models fitted within the computation time and memory constraints we imposed,  
698 according to the spatial sampling bias and sample size of training data and the species distribution  
699 modelling method. Species distribution modelling methods were (A) generalized linear models, (B)  
700 boosted regression trees, and (C) inverse distance-weighted interpolation. Spatial biases were no  
701 bias (Simpson evenness = 1), low (e.g. birds, Simpson evenness = 0.76), median (e.g. butterflies,  
702 Simpson evenness = 0.13), and severe (e.g. moths, Simpson evenness = 0.02).

703

704 **Fig. 5. Expected prediction performance of species distribution models for 110 simulated**  
705 **species under a range of sample size and spatial sampling bias scenarios.** Panels show the  
706 expected prediction performance of species distribution models constructed using (A) generalize  
707 linear models, (B) boosted regression trees, and (C) inverse distance-weighted interpolation. Lines  
708 show expected area under the receiver operating characteristic curve (AUC) given the sample size

709 and spatial sampling bias of training data, and the species distribution modelling method. Rug plots  
710 indicate sample sizes (mean number of records per species) of the virtual biological records datasets  
711 used to train species distribution models.

712

713 **Fig. 6. Observed prediction performance (AUC) of species distribution models for 110**  
714 **virtual species under a range of sample size and spatial sampling bias scenarios.** Panels show  
715 the observed area under the receiver operating characteristic curve (AUC) of species distribution  
716 models constructed using (A) generalized linear models, (B) boosted regression trees, and (C)  
717 inverse distance-weighted interpolation. Boxes contain the middle 50% of the observed AUC  
718 values. The horizontal line within each box indicates the median AUC value. Each box plot (box,  
719 whiskers, and outlying points) represents 110 observations (one for each virtual species) unless  
720 models failed to fit for some species (see Fig. 4). The width of boxes is proportional to the square  
721 root of the number of observations in that group.

722

723 **Fig. 7. Observed prediction performance (RMSE) of species distribution models for 110**  
724 **virtual species under a range of sample size and spatial sampling bias scenarios.** Panels show  
725 the observed root mean squared error (RMSE) of species distribution models constructed using (A)  
726 generalized linear models, (B) boosted regression trees, and (C) inverse distance-weighted  
727 interpolation. Boxes contain the middle 50% of the observed RMSE values. The horizontal line  
728 within each box indicates the median RMSE value. Each box plot (box, whiskers, and outlying  
729 points) represents 110 observations (one for each virtual species) unless models failed to fit for

730 some species (see Fig. 4). The width of boxes is proportional to the square root of the number of  
731 observations in that group.

732

733 **Fig. 8. Contour plot of expected prediction performance of species distribution models as a**  
734 **function of the sample size and spatial sampling bias in virtual biological records datasets.**

735 Expected prediction performance (AUC, contours and shading) of generalized linear model (GLM)  
736 species distribution models from the (A) large- and (B) small-community simulations, according to  
737 the spatial sampling evenness and sample size of training data (note the different scales of the  
738 horizontal axes in A and B). Spatial sampling evenness was quantified using Simpson evenness.  
739 High values of Simpson evenness indicate minimal spatial bias. Open circles show the values of  
740 sample size and spatial sampling evenness for virtual biological records datasets used to train  
741 species distribution models. Filled black circles show sample size and spatial sampling evenness of  
742 Irish biological records datasets used as spatial sampling templates.

743 **Table 1. Environmental predictor variables used to define and model the distribution of**  
 744 **virtual species in Ireland.** Moran's I values indicate the spatial clustering of values for each  
 745 variable, where a value of one indicates strong spatial clustering of variable values, zero indicates  
 746 random spatial arrangement of values, and negative one indicates strongly dispersed spatial  
 747 arrangement of values. Details of data sources are in Section 2.1.  
 748

| Variable                                                     | Description                                                                                         | Data Source                | Moran's I |
|--------------------------------------------------------------|-----------------------------------------------------------------------------------------------------|----------------------------|-----------|
| annual minimum temperature (degrees C)                       | 2% quantile of annual temperatures in each grid cell averaged over the years 1995-2016              | E-OBS                      | 0.84      |
| annual maximum temperature (degrees C)                       | 98% quantile of annual temperatures in each grid cell averaged over the years 1995-2016             | E-OBS                      | 0.83      |
| annual precipitation (mm)                                    | Average total annual precipitation in each grid cell over the years 1995-2016 (excluding 2010-2012) | E-OBS                      | 0.82      |
| average daily sea level atmospheric pressure (hecto Pascals) | Average daily sea level atmospheric pressure over the years 1995-2016                               | E-OBS                      | 0.86      |
| agricultural areas                                           | Proportion of each grid cell classified as agricultural areas                                       | CORINE Land Cover Database | 0.53      |
| artificial surfaces                                          | Proportion of each grid cell classified as artificial surfaces                                      | CORINE Land Cover Database | 0.44      |
| forest and semi-natural areas                                | Proportion of each grid cell classified as forest and semi-natural areas                            | CORINE Land Cover Database | 0.41      |
| water bodies                                                 | Proportion of each grid cell classified as water bodies                                             | CORINE Land Cover Database | 0.35      |
| wetlands                                                     | Proportion of each grid cell classified as wetlands                                                 | CORINE Land Cover Database | 0.55      |
| elevation                                                    | Average elevation in each grid cell                                                                 | ETOPO1                     | 0.29      |

749 **Table 2. Importance of sample size, spatial bias, and modelling method for determining**  
750 **predictive performance of species distribution models.** Variable importance measures from a  
751 boosted regression tree show the relative influence of sample size (average number of records per  
752 species), species distribution modeling method, and spatial bias in training data on prediction  
753 performance (AUC) of species distribution models. The relative influence for each variable is the  
754 reduction in squared error attributed to that variable in a boosted regression tree model.

| Variable                              | Relative importance (reduction in squared error) |
|---------------------------------------|--------------------------------------------------|
| Average number of records per species | 78.5                                             |
| Species distribution modelling method | 14.8                                             |
| Spatial bias                          | 6.7                                              |

755

756

757

758 **Table 3. Spatial sampling evenness of the spatial sampling template datasets measured**  
759 **using Simpson evenness.** A value of one indicates perfectly even sampling (all grid squares  
760 containing the same number of records). Lower Simpson evenness values indicate more spatially  
761 uneven sampling.

| Spatial sampling template | Simpson evenness value |
|---------------------------|------------------------|
| no bias                   | 1                      |
| low bias (birds)          | 0.762                  |
| median bias (butterflies) | 0.126                  |
| severe bias (moths)       | 0.021                  |

762



A

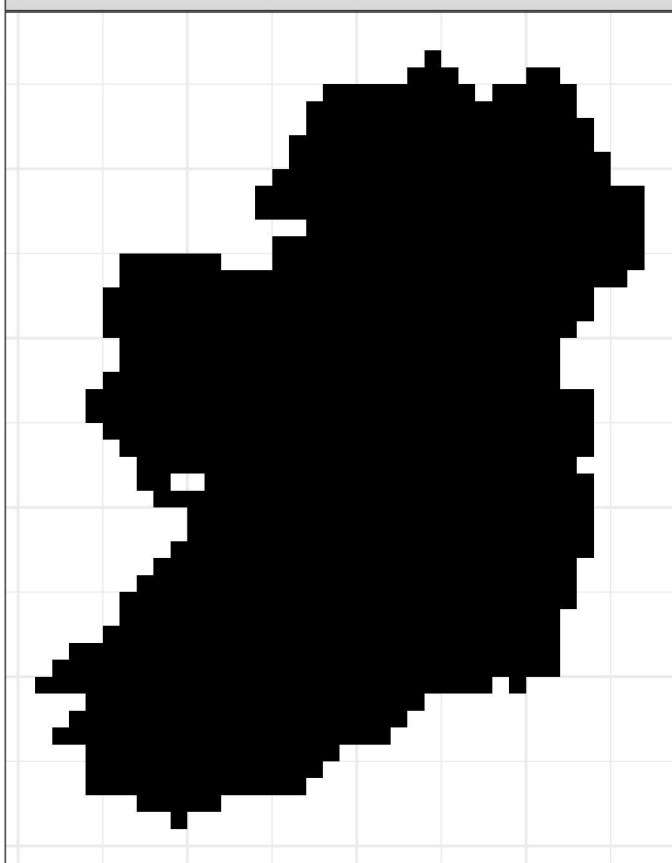

B

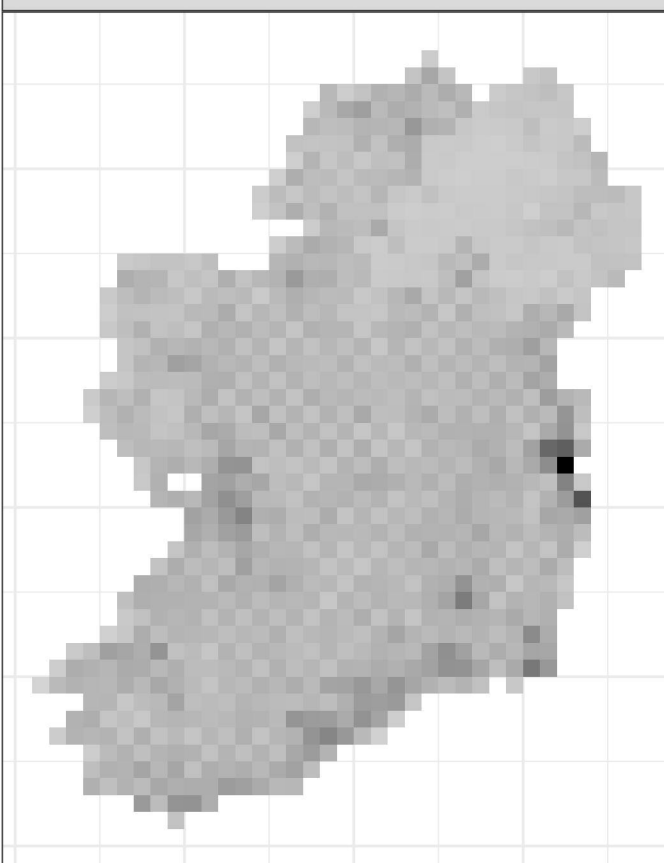

C

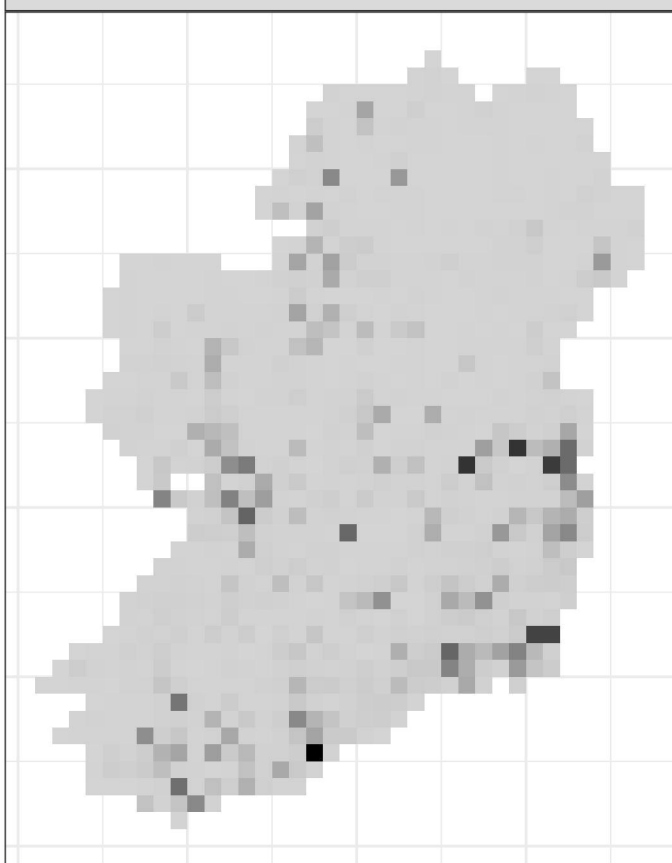

D

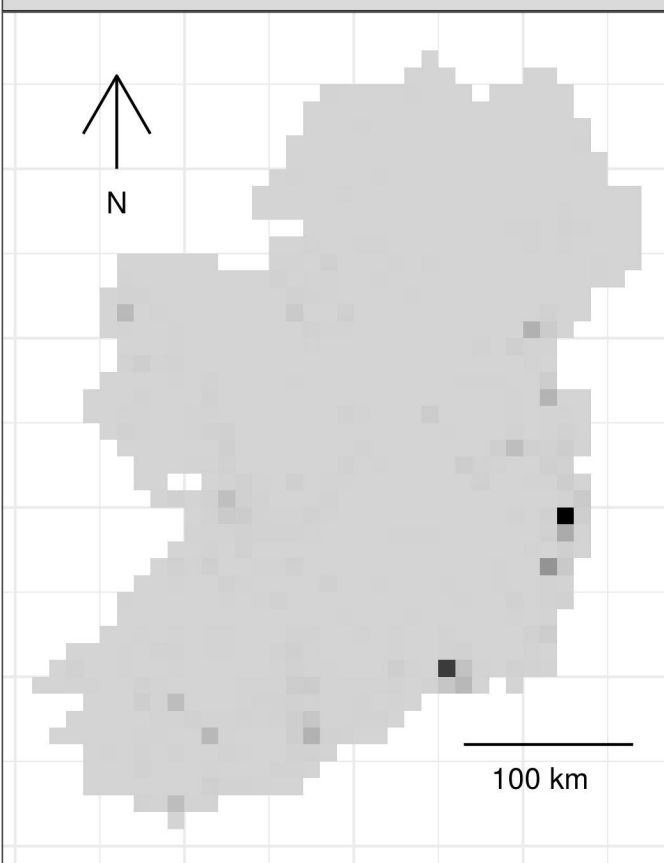

Relative  
Recording  
Effort

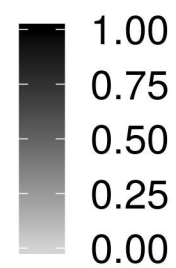

True virtual  
species  
distribution

A

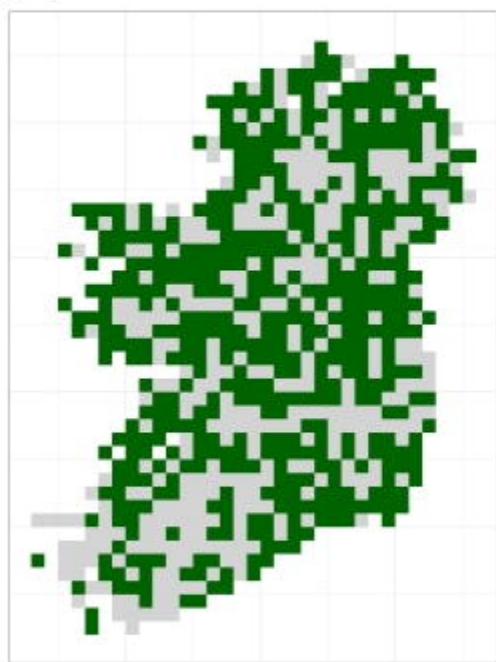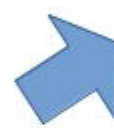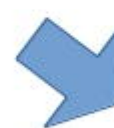

Training data

B

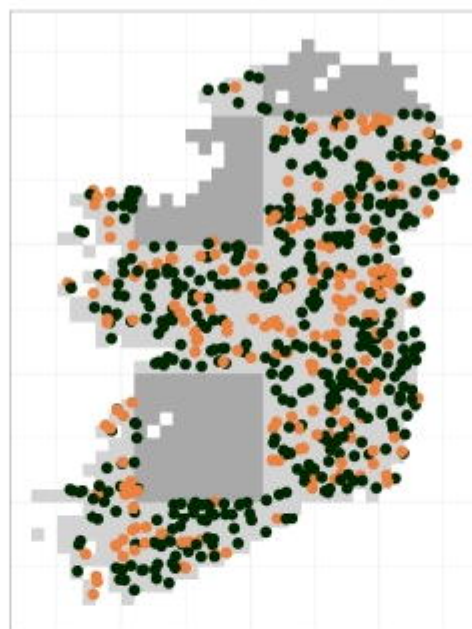

C

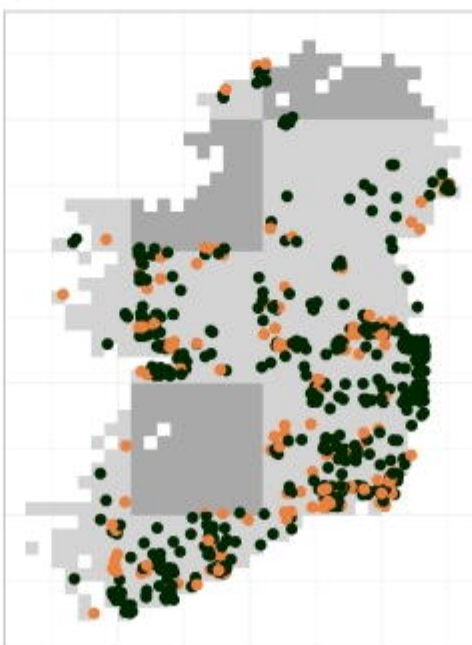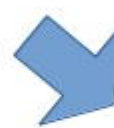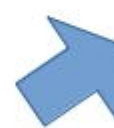

Evaluation data

D

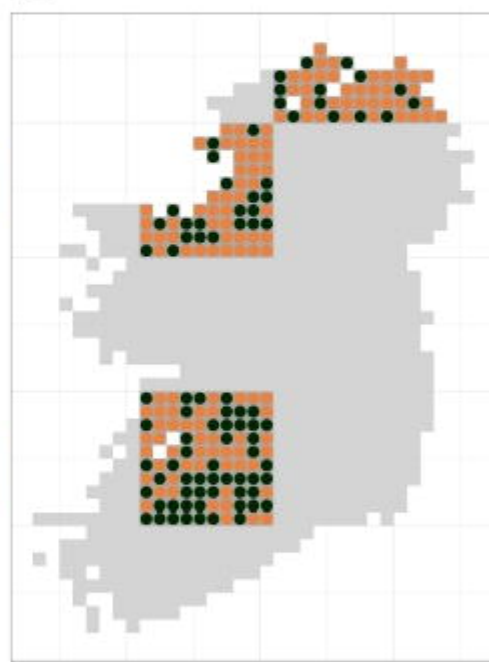

A

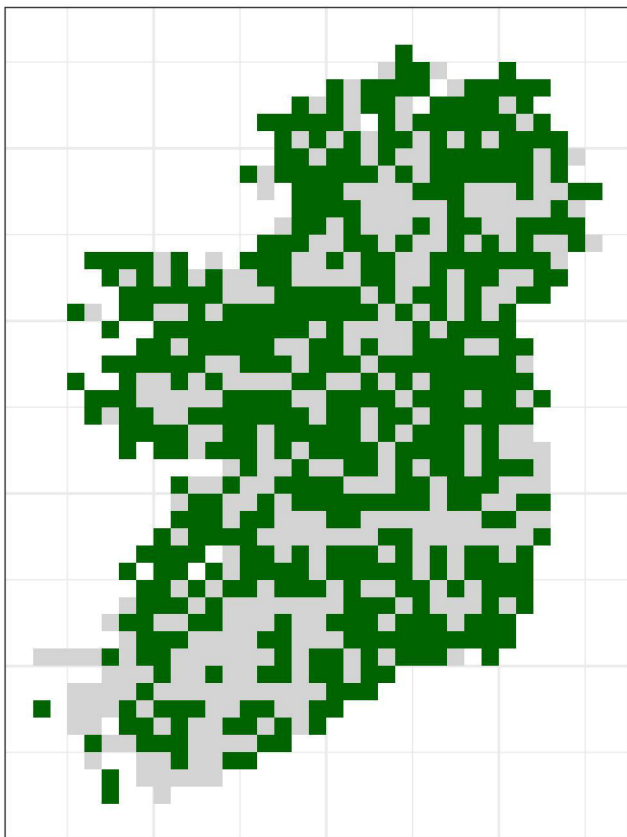

B

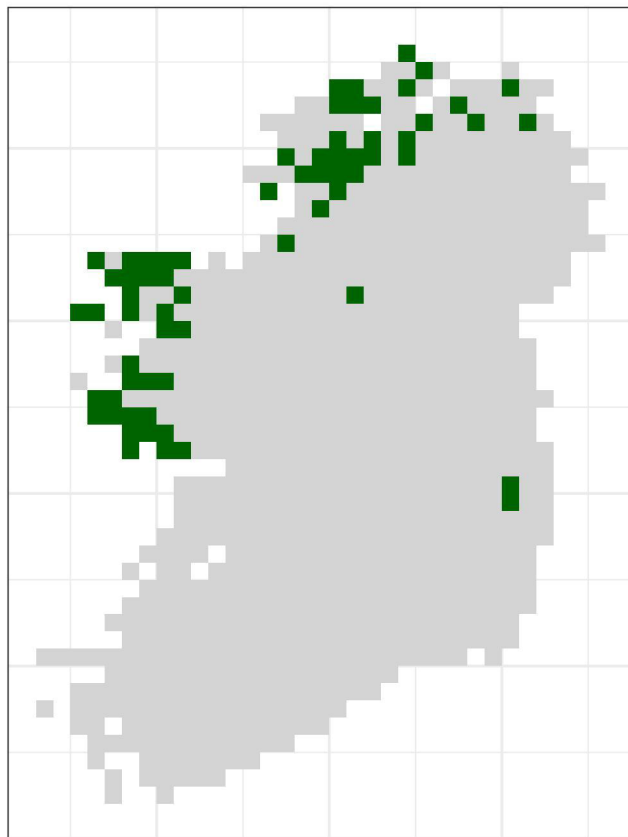

C

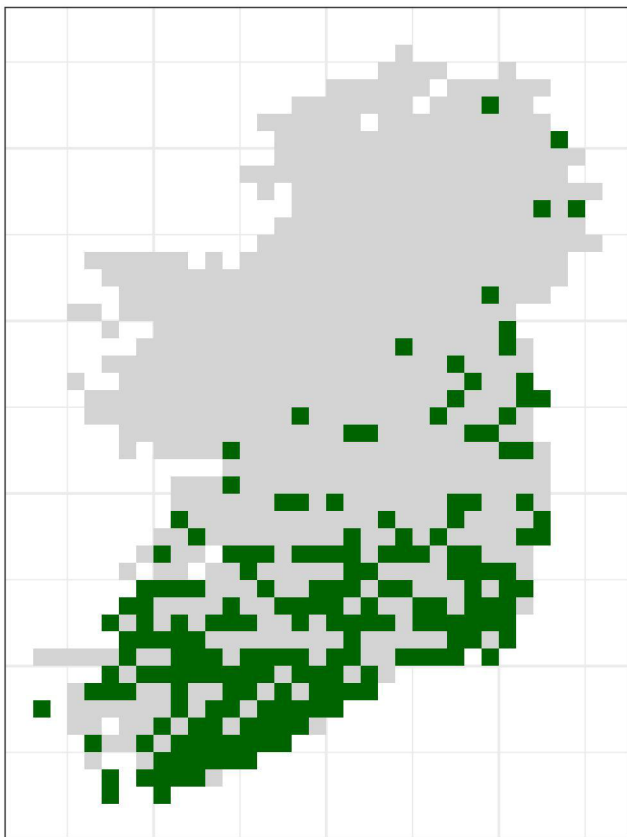

D

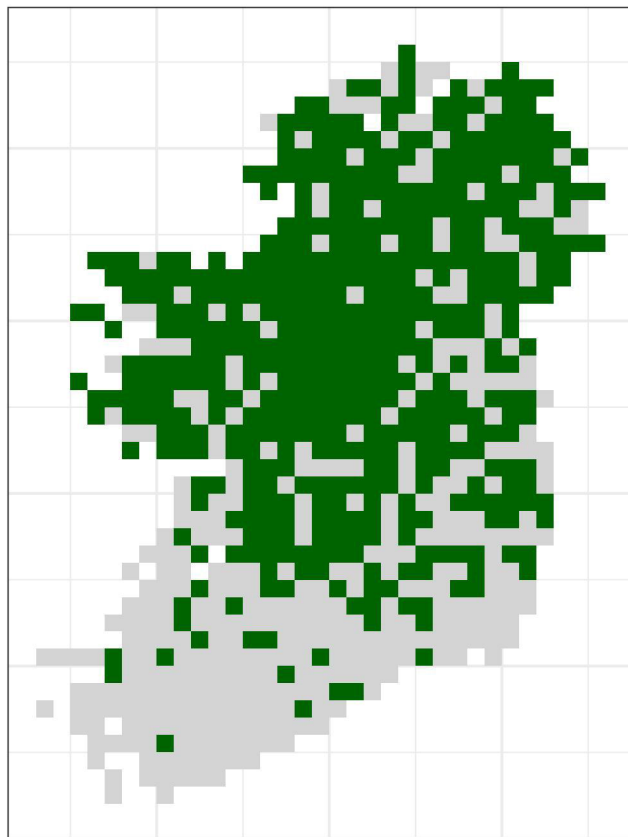

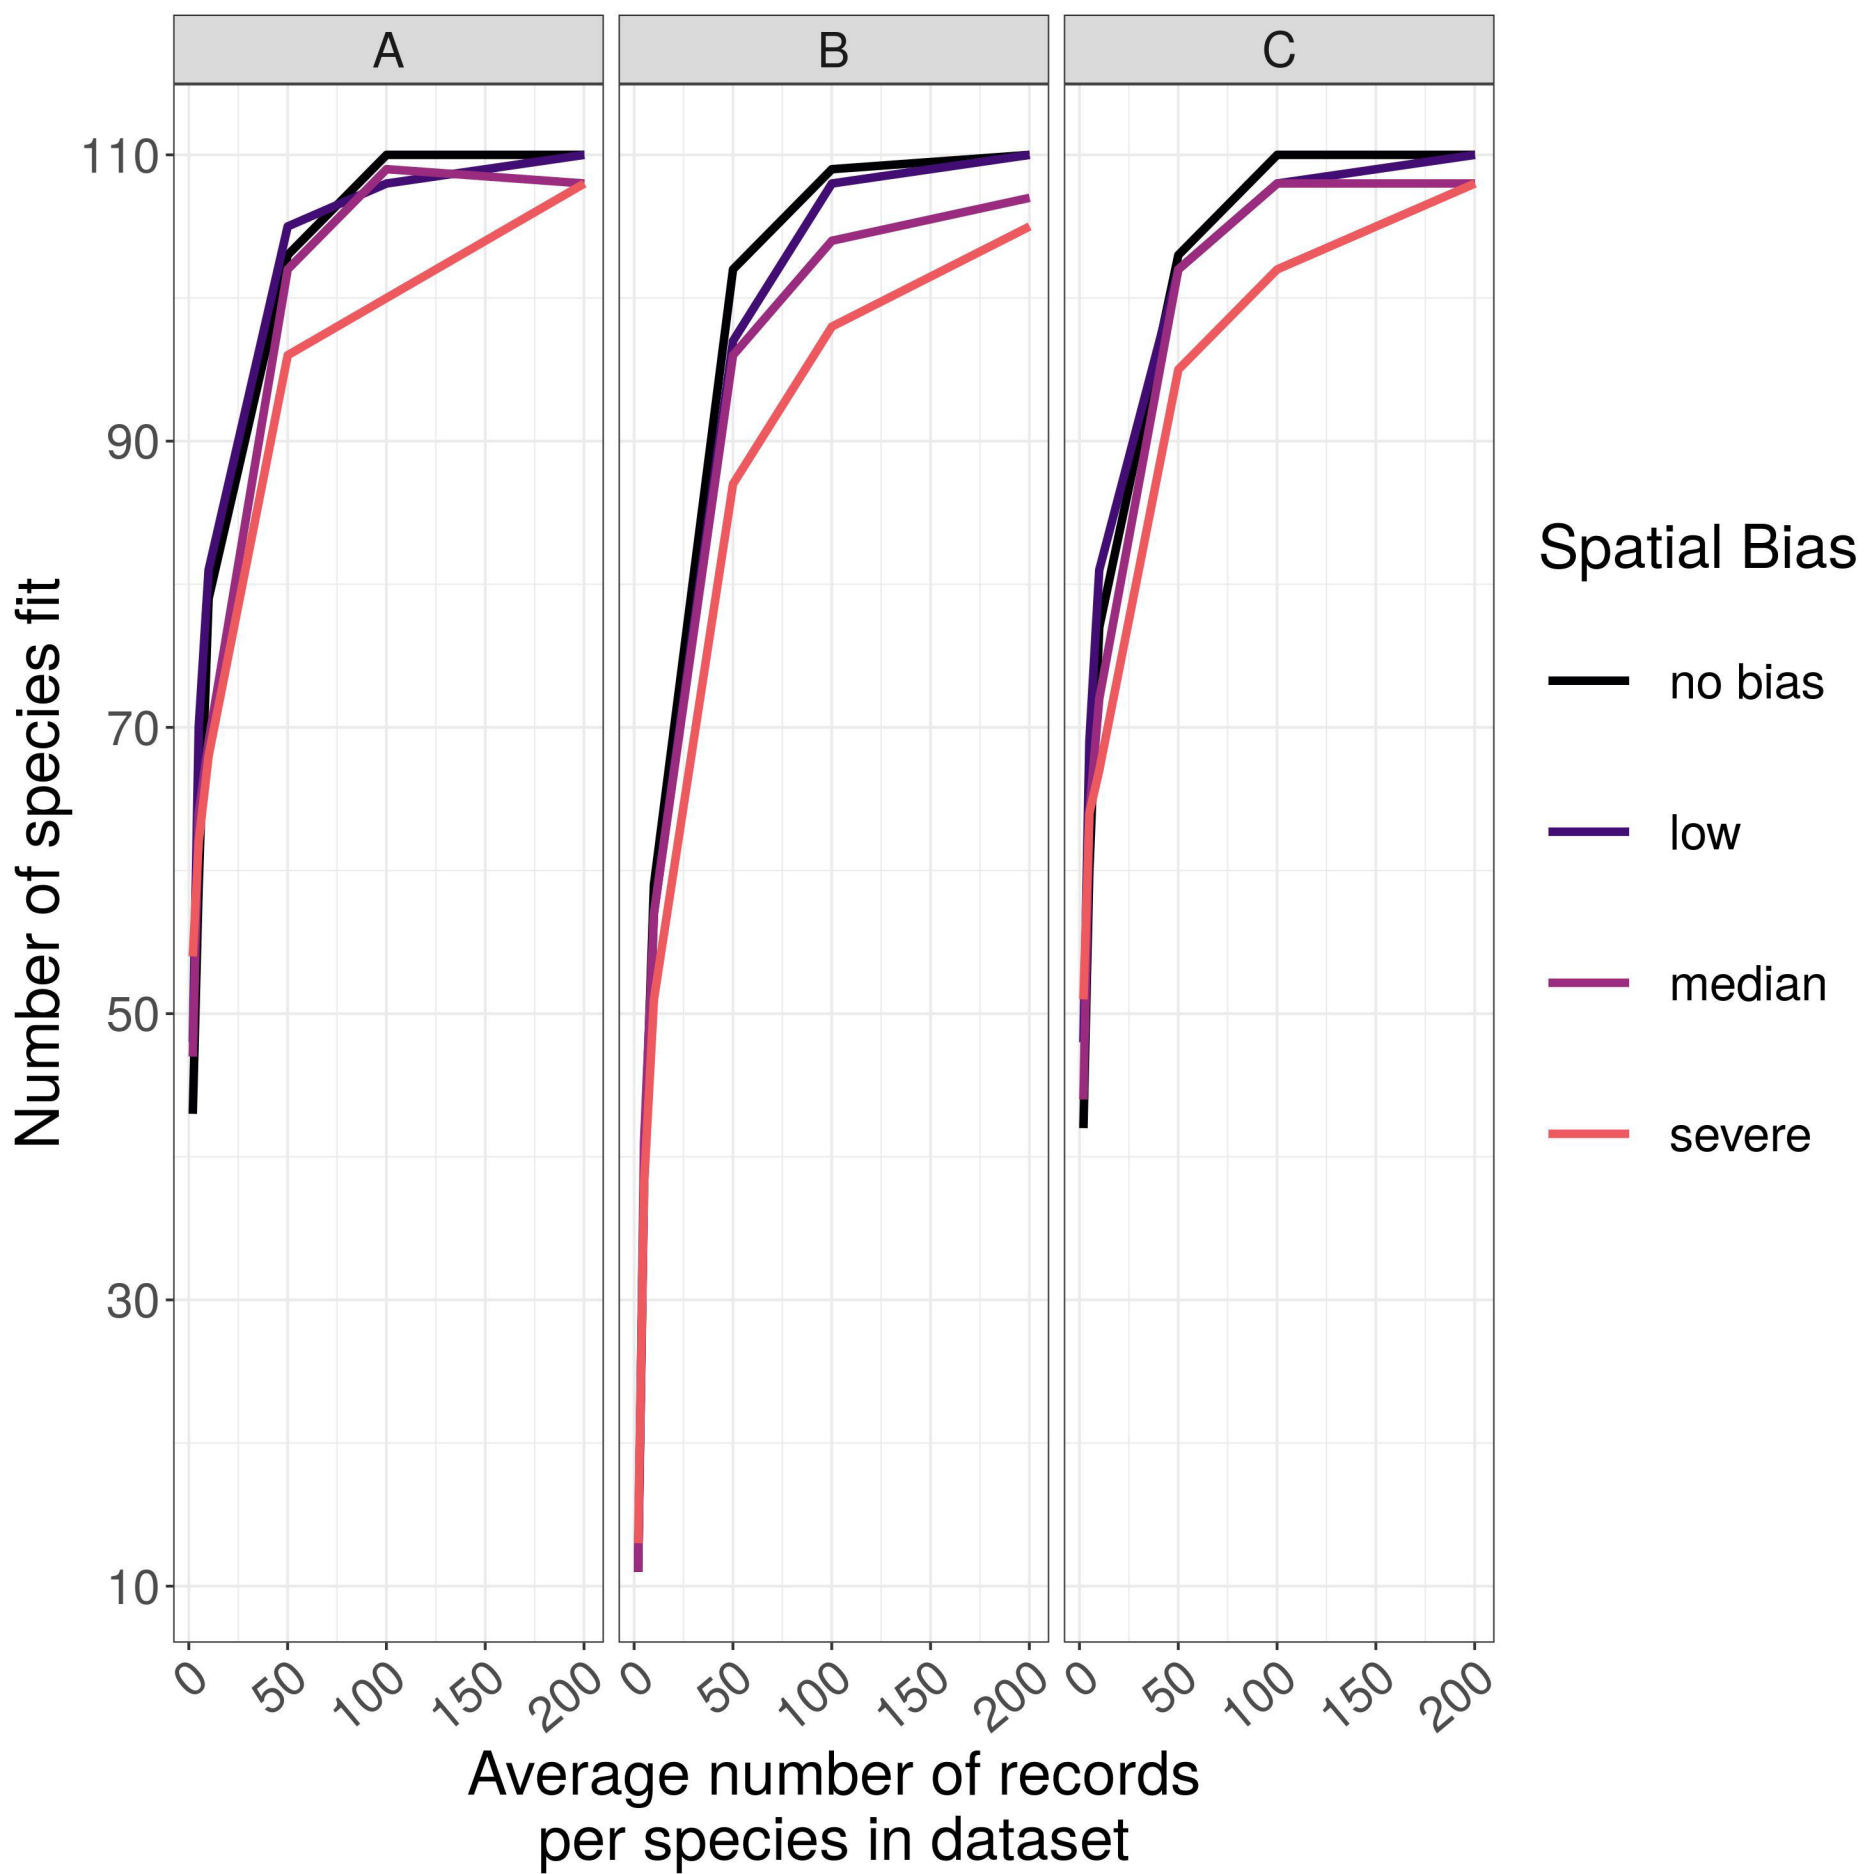

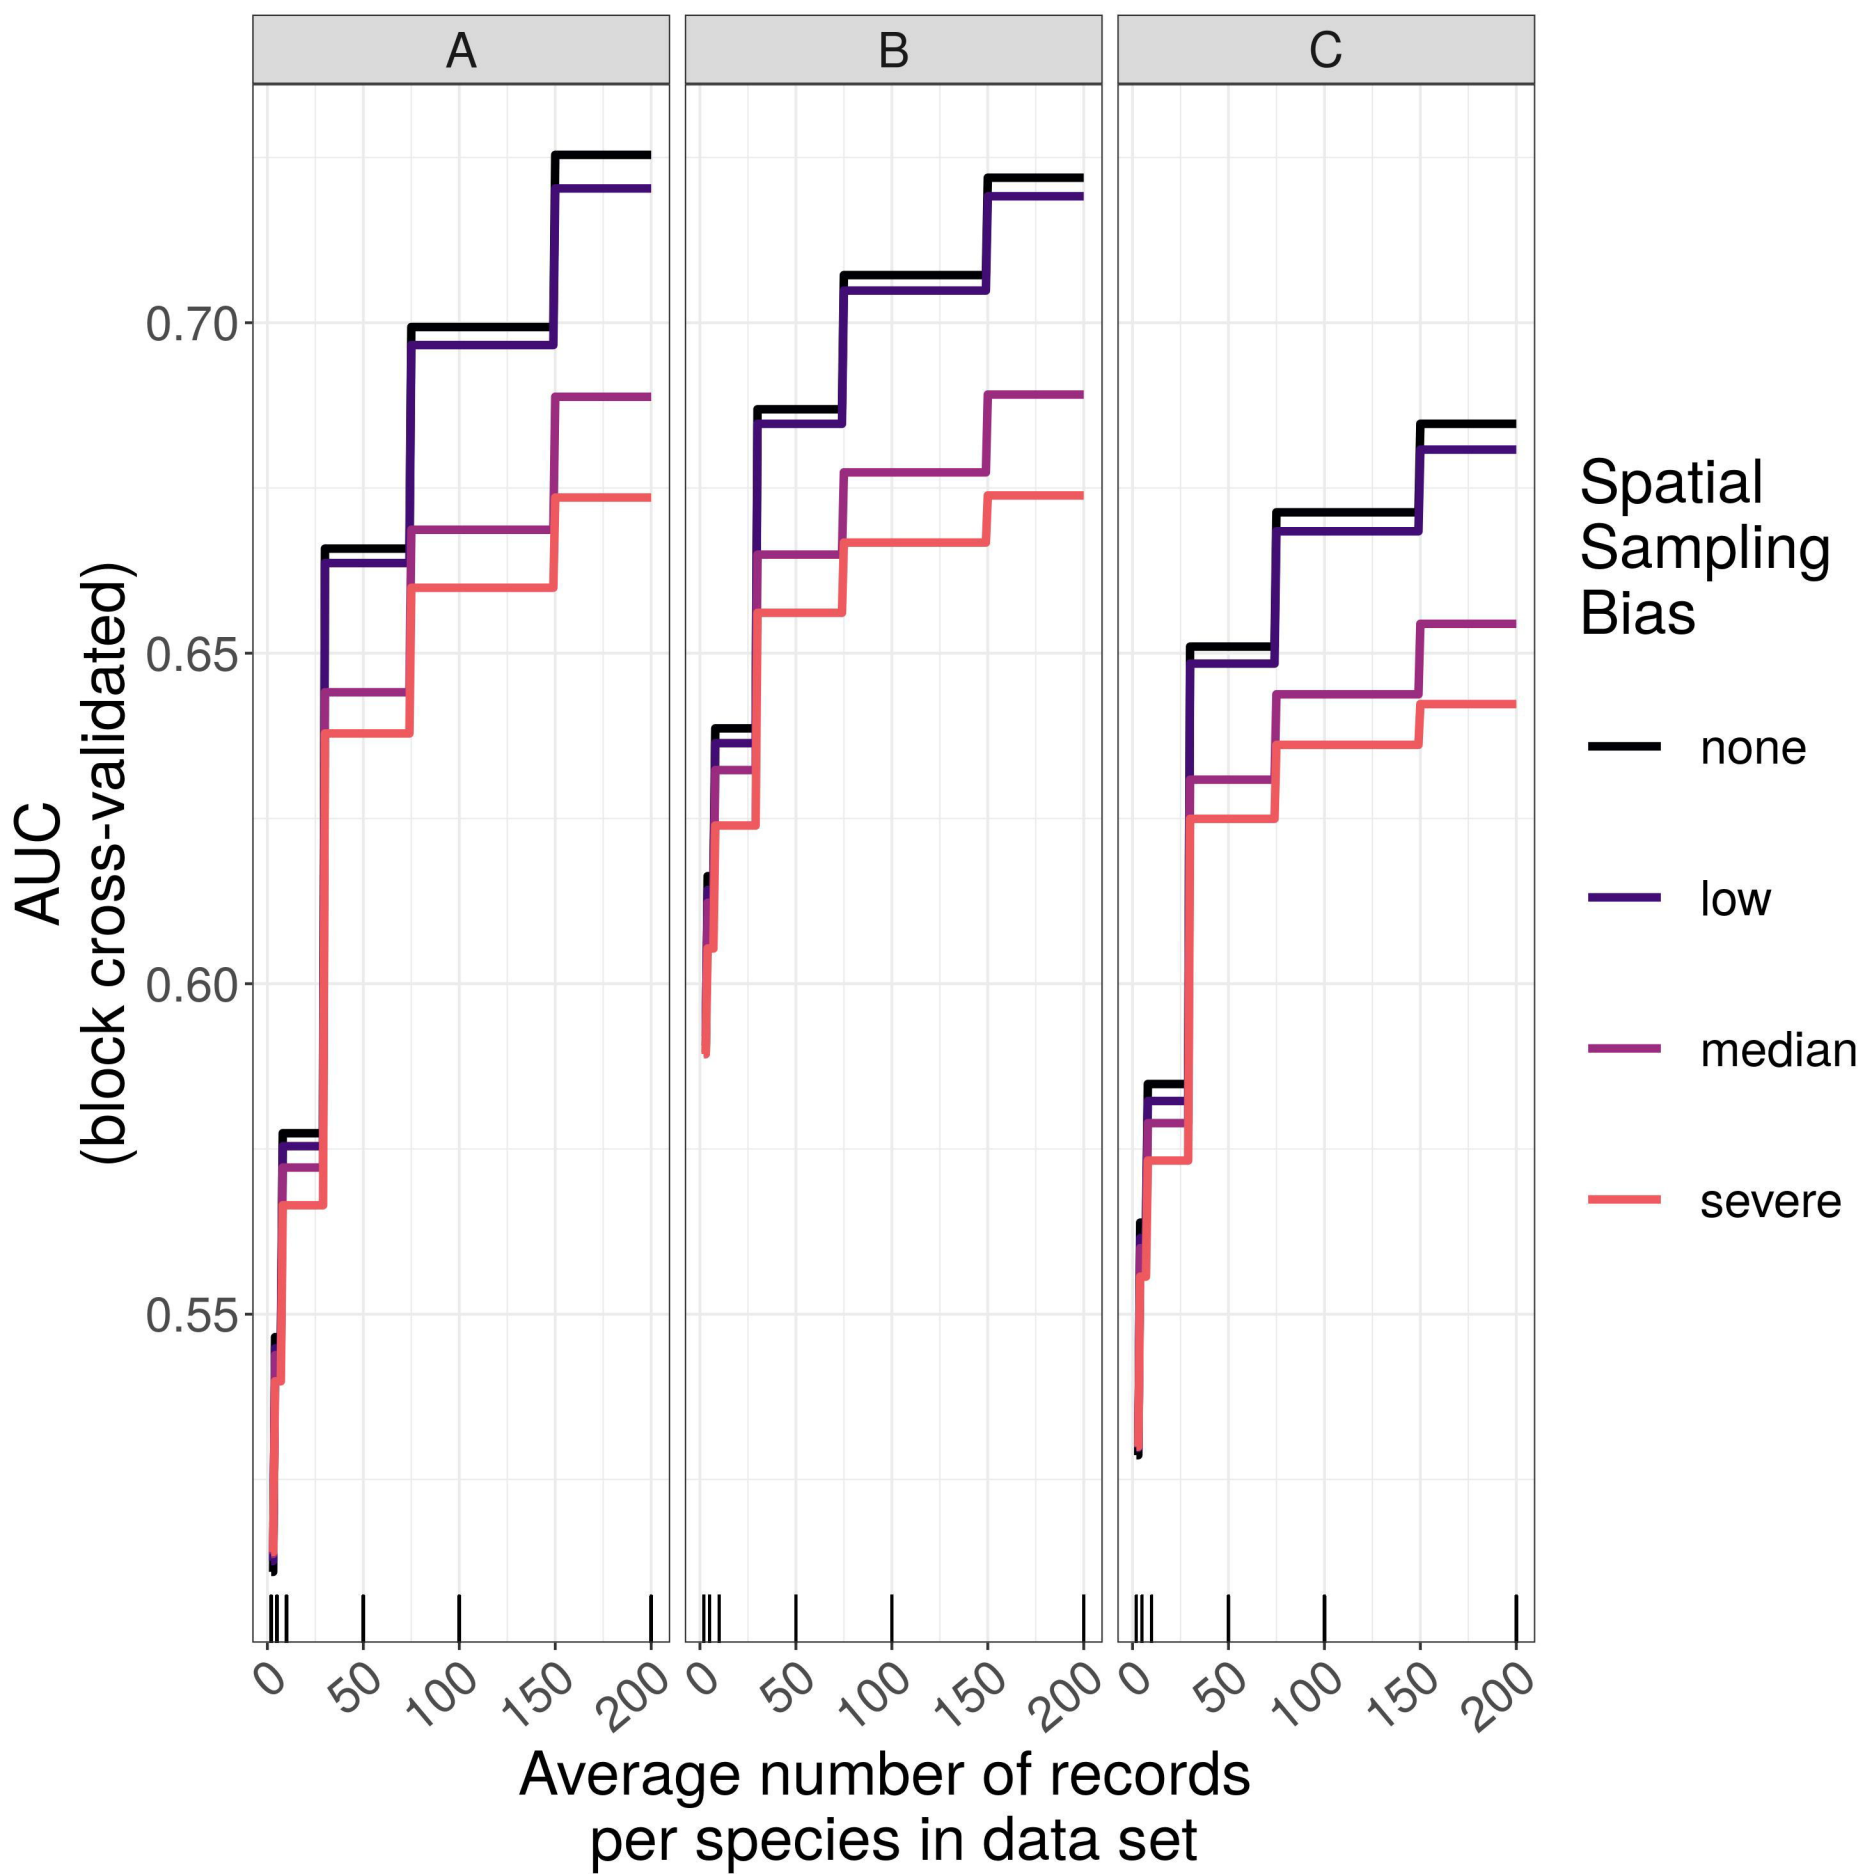

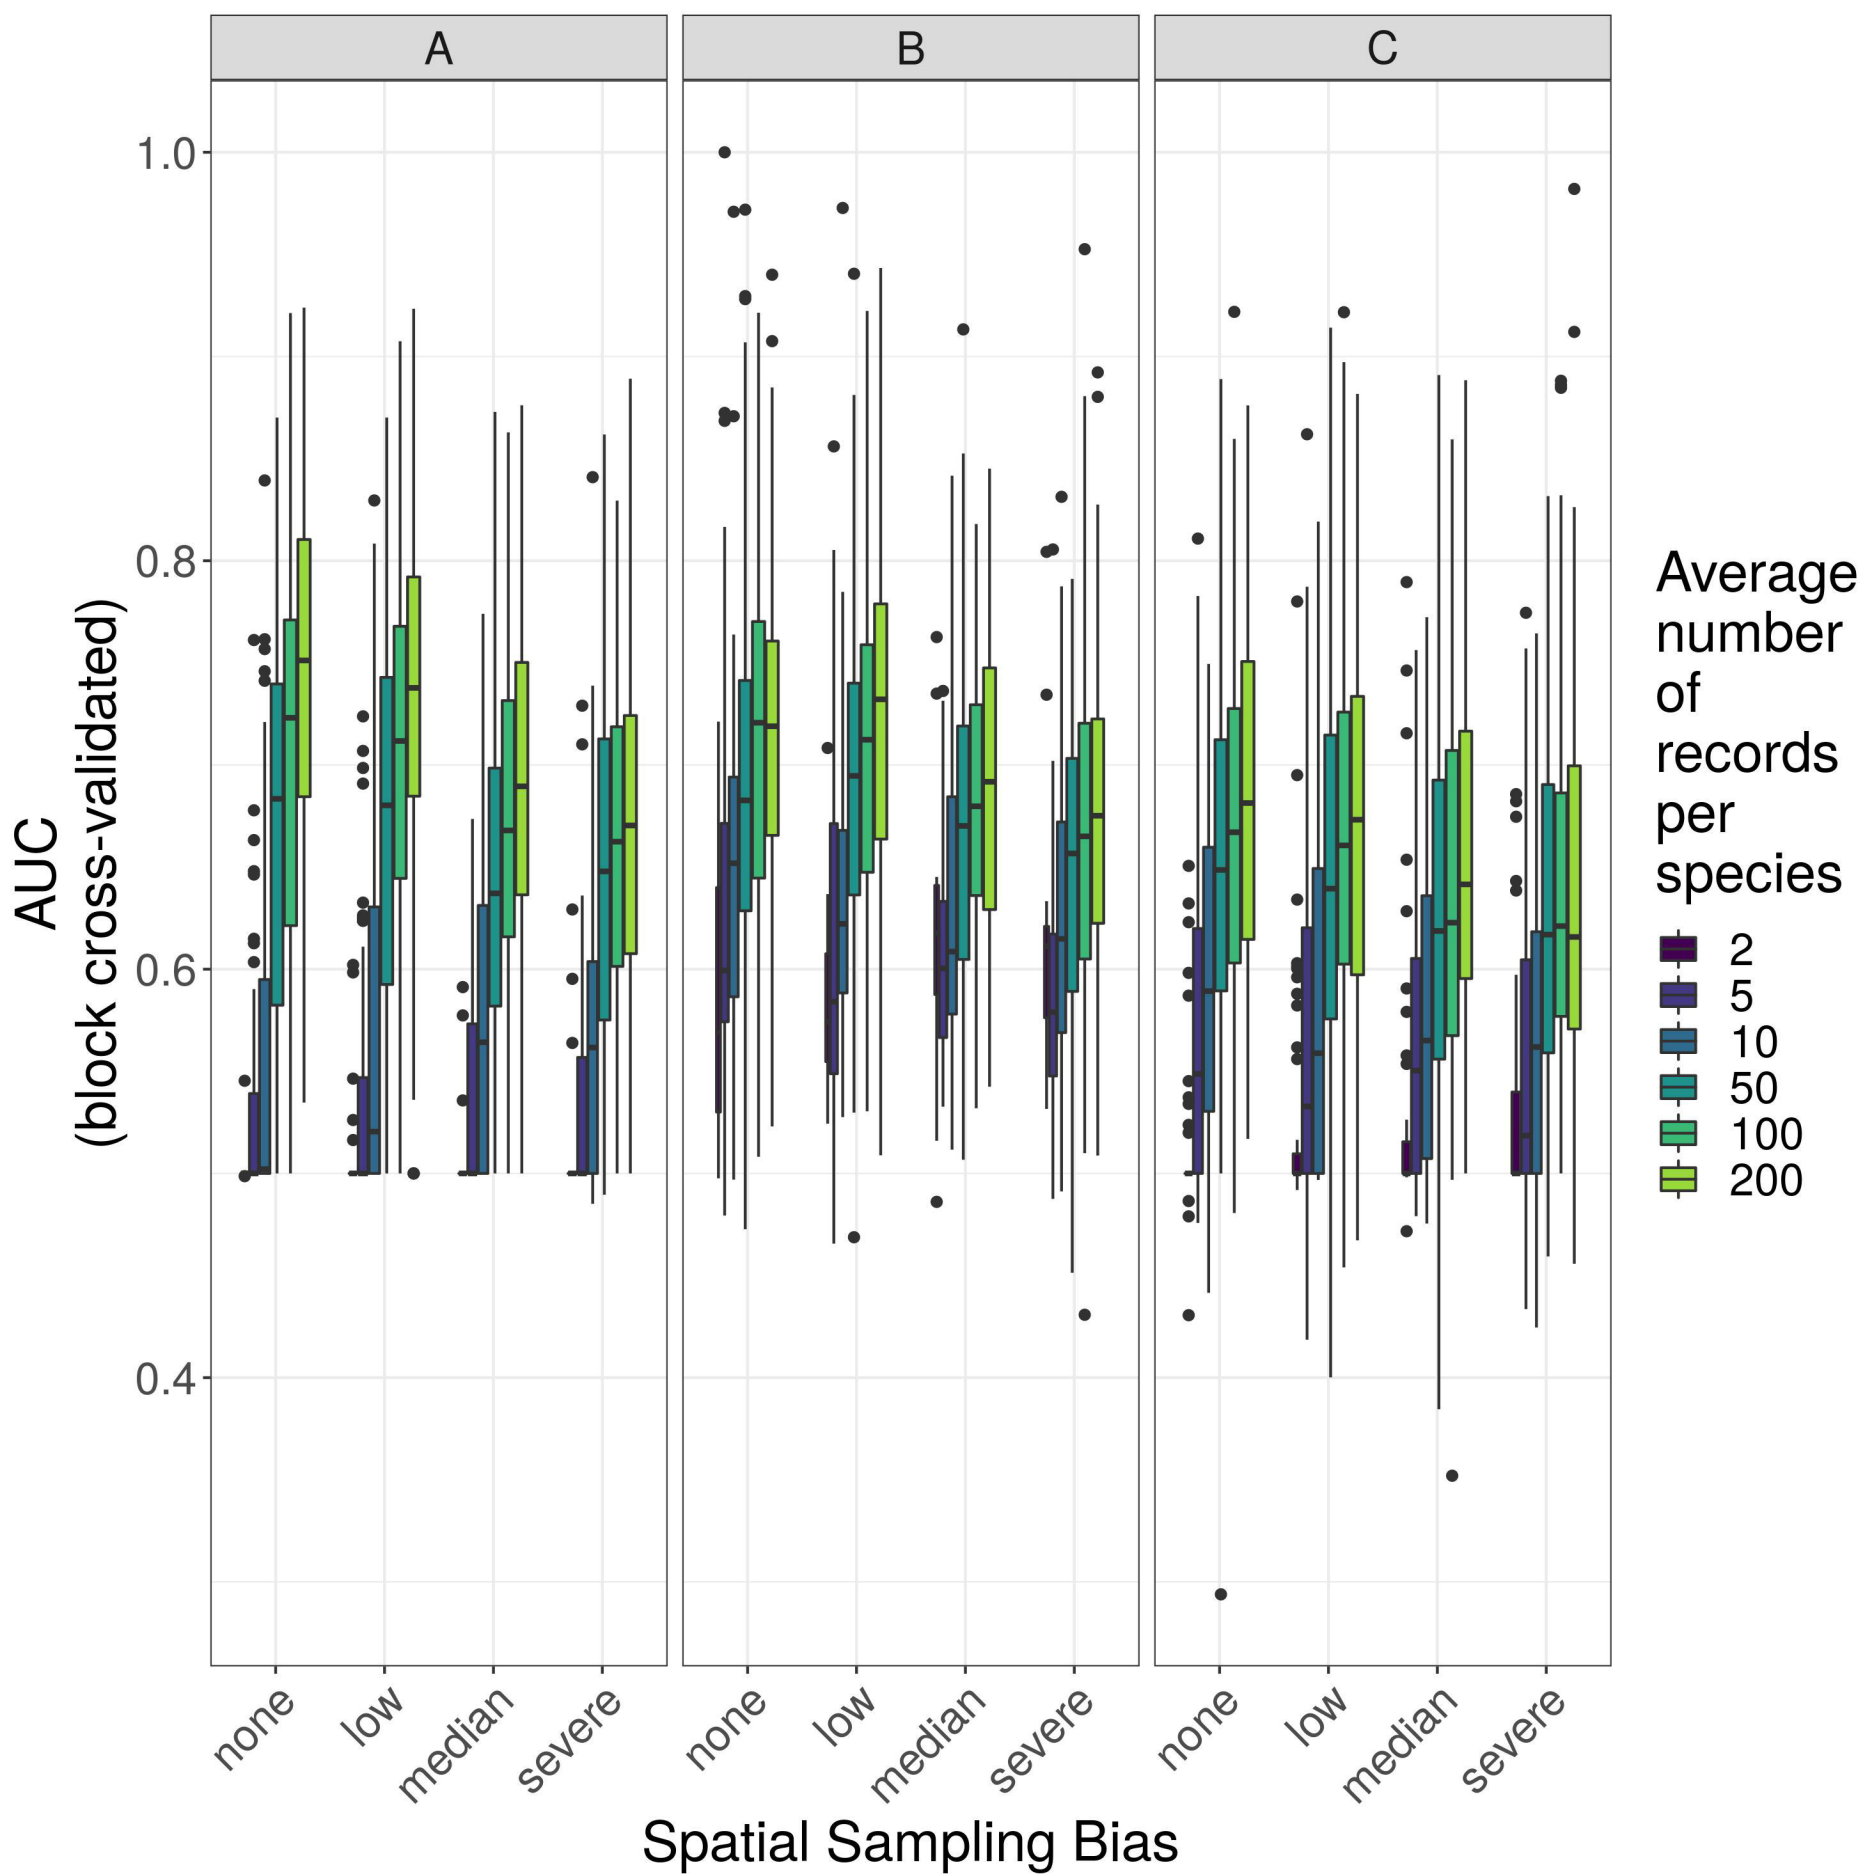

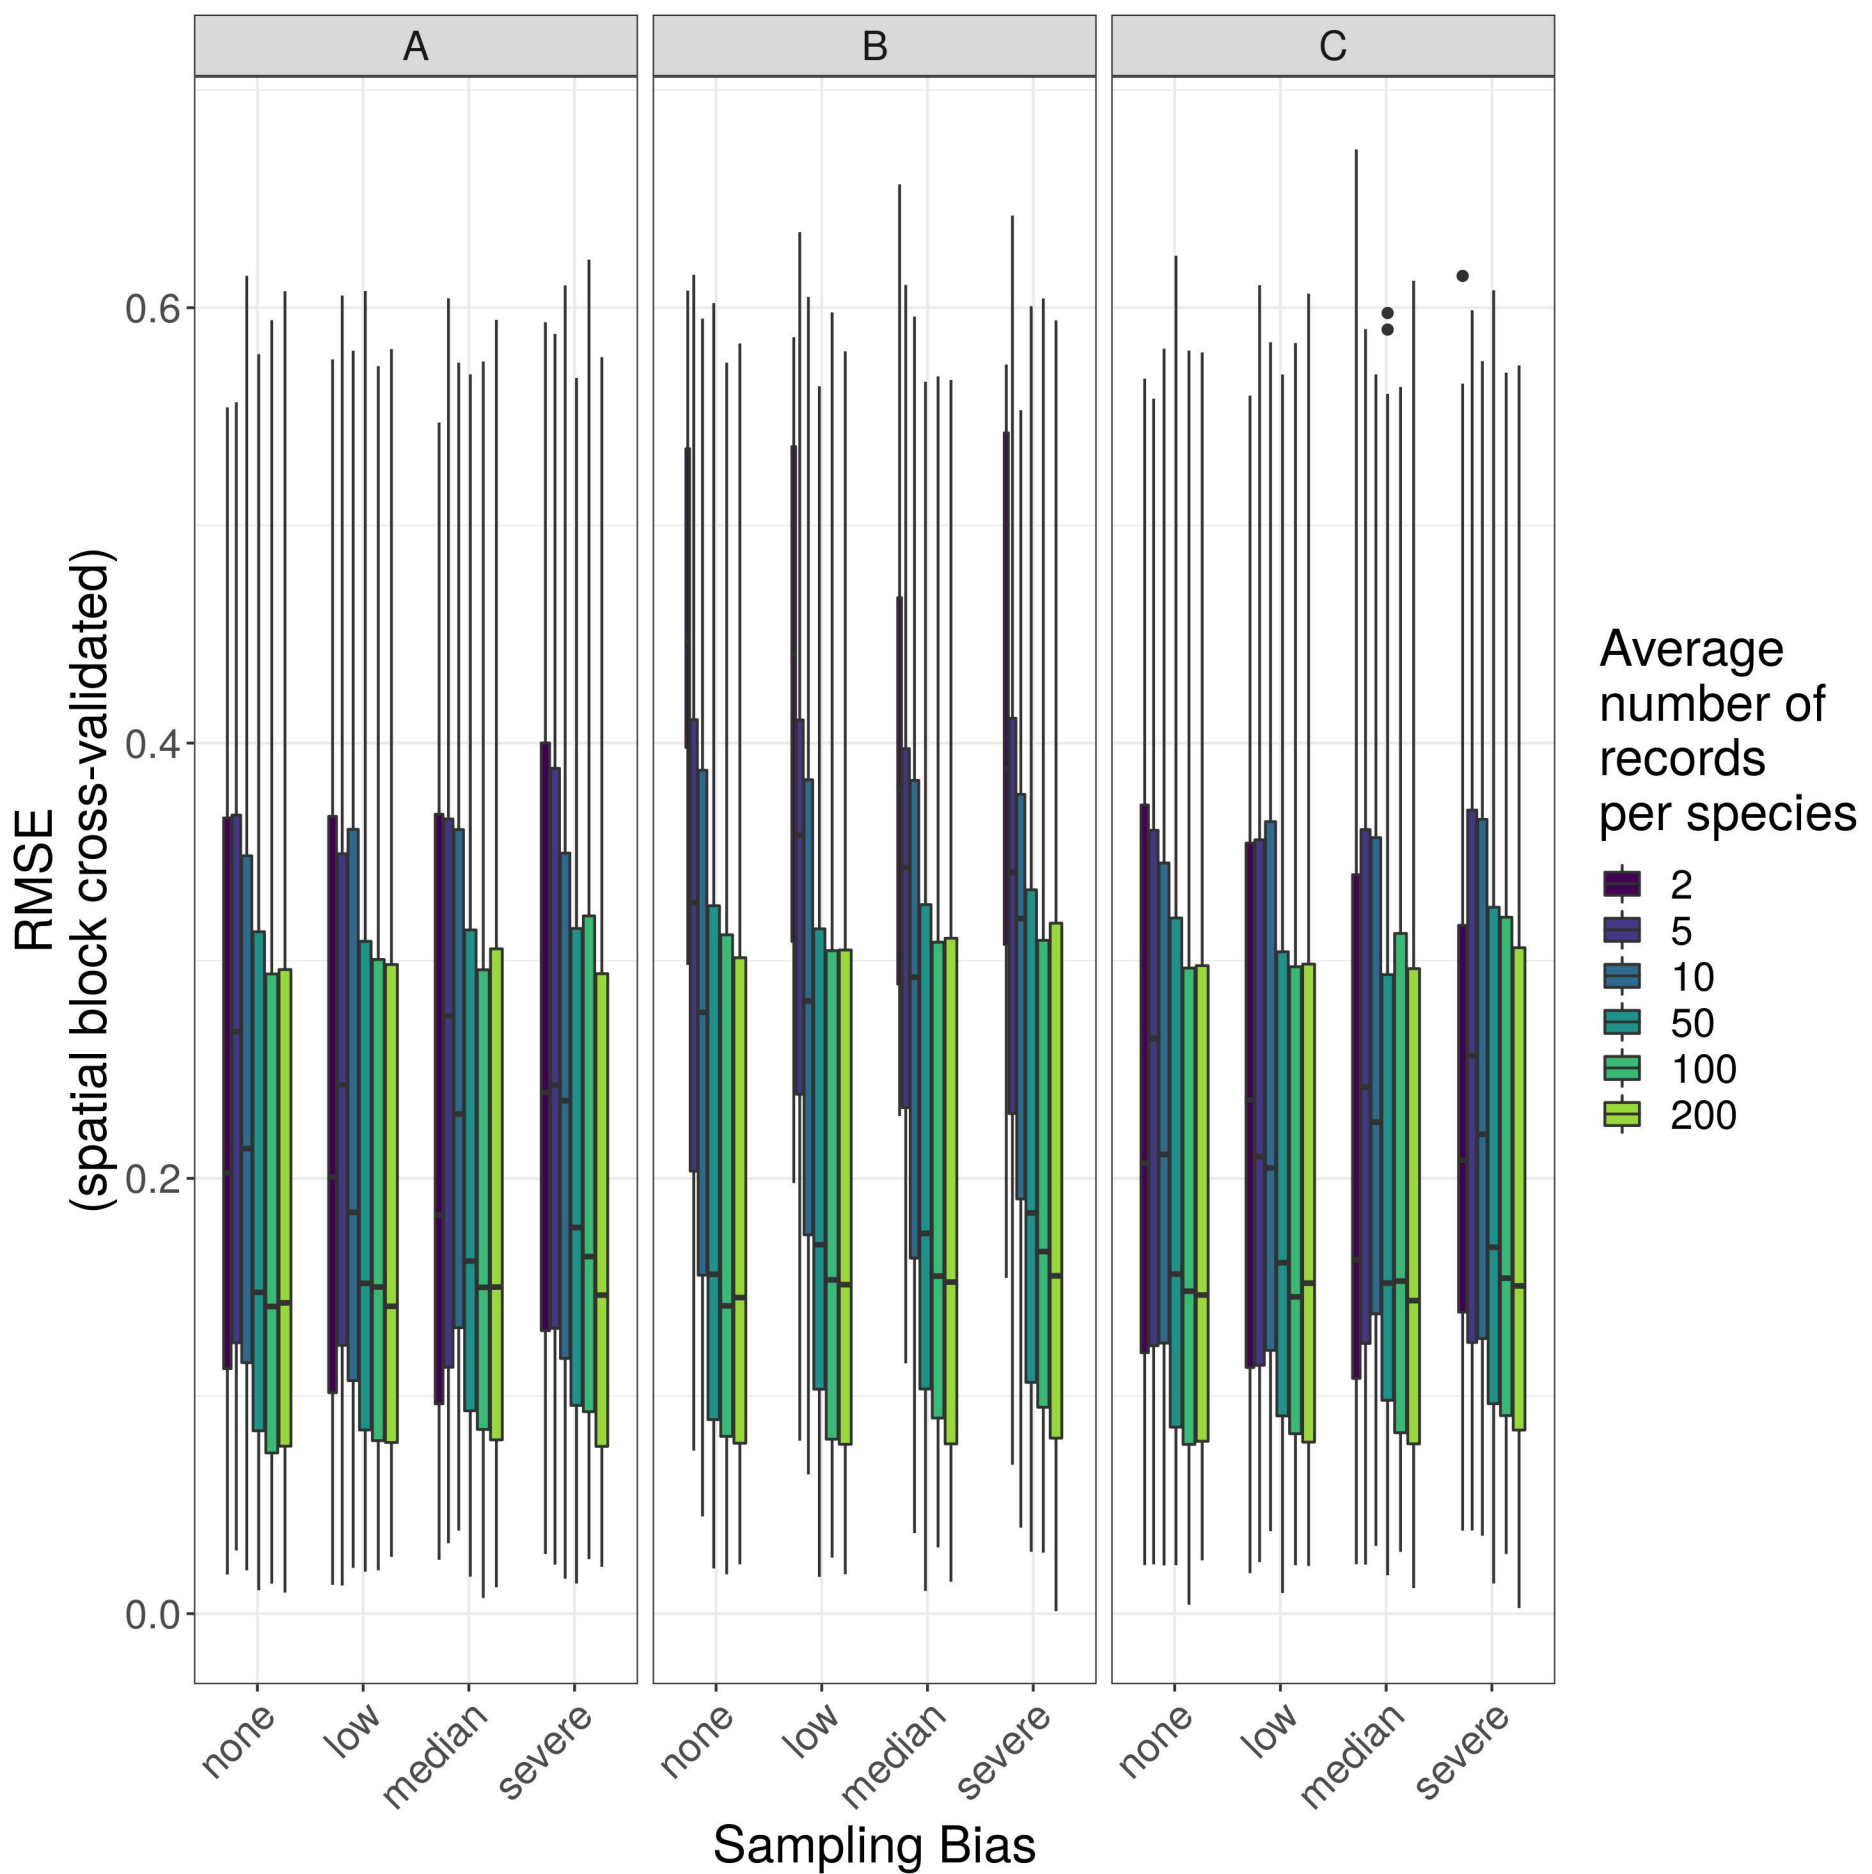



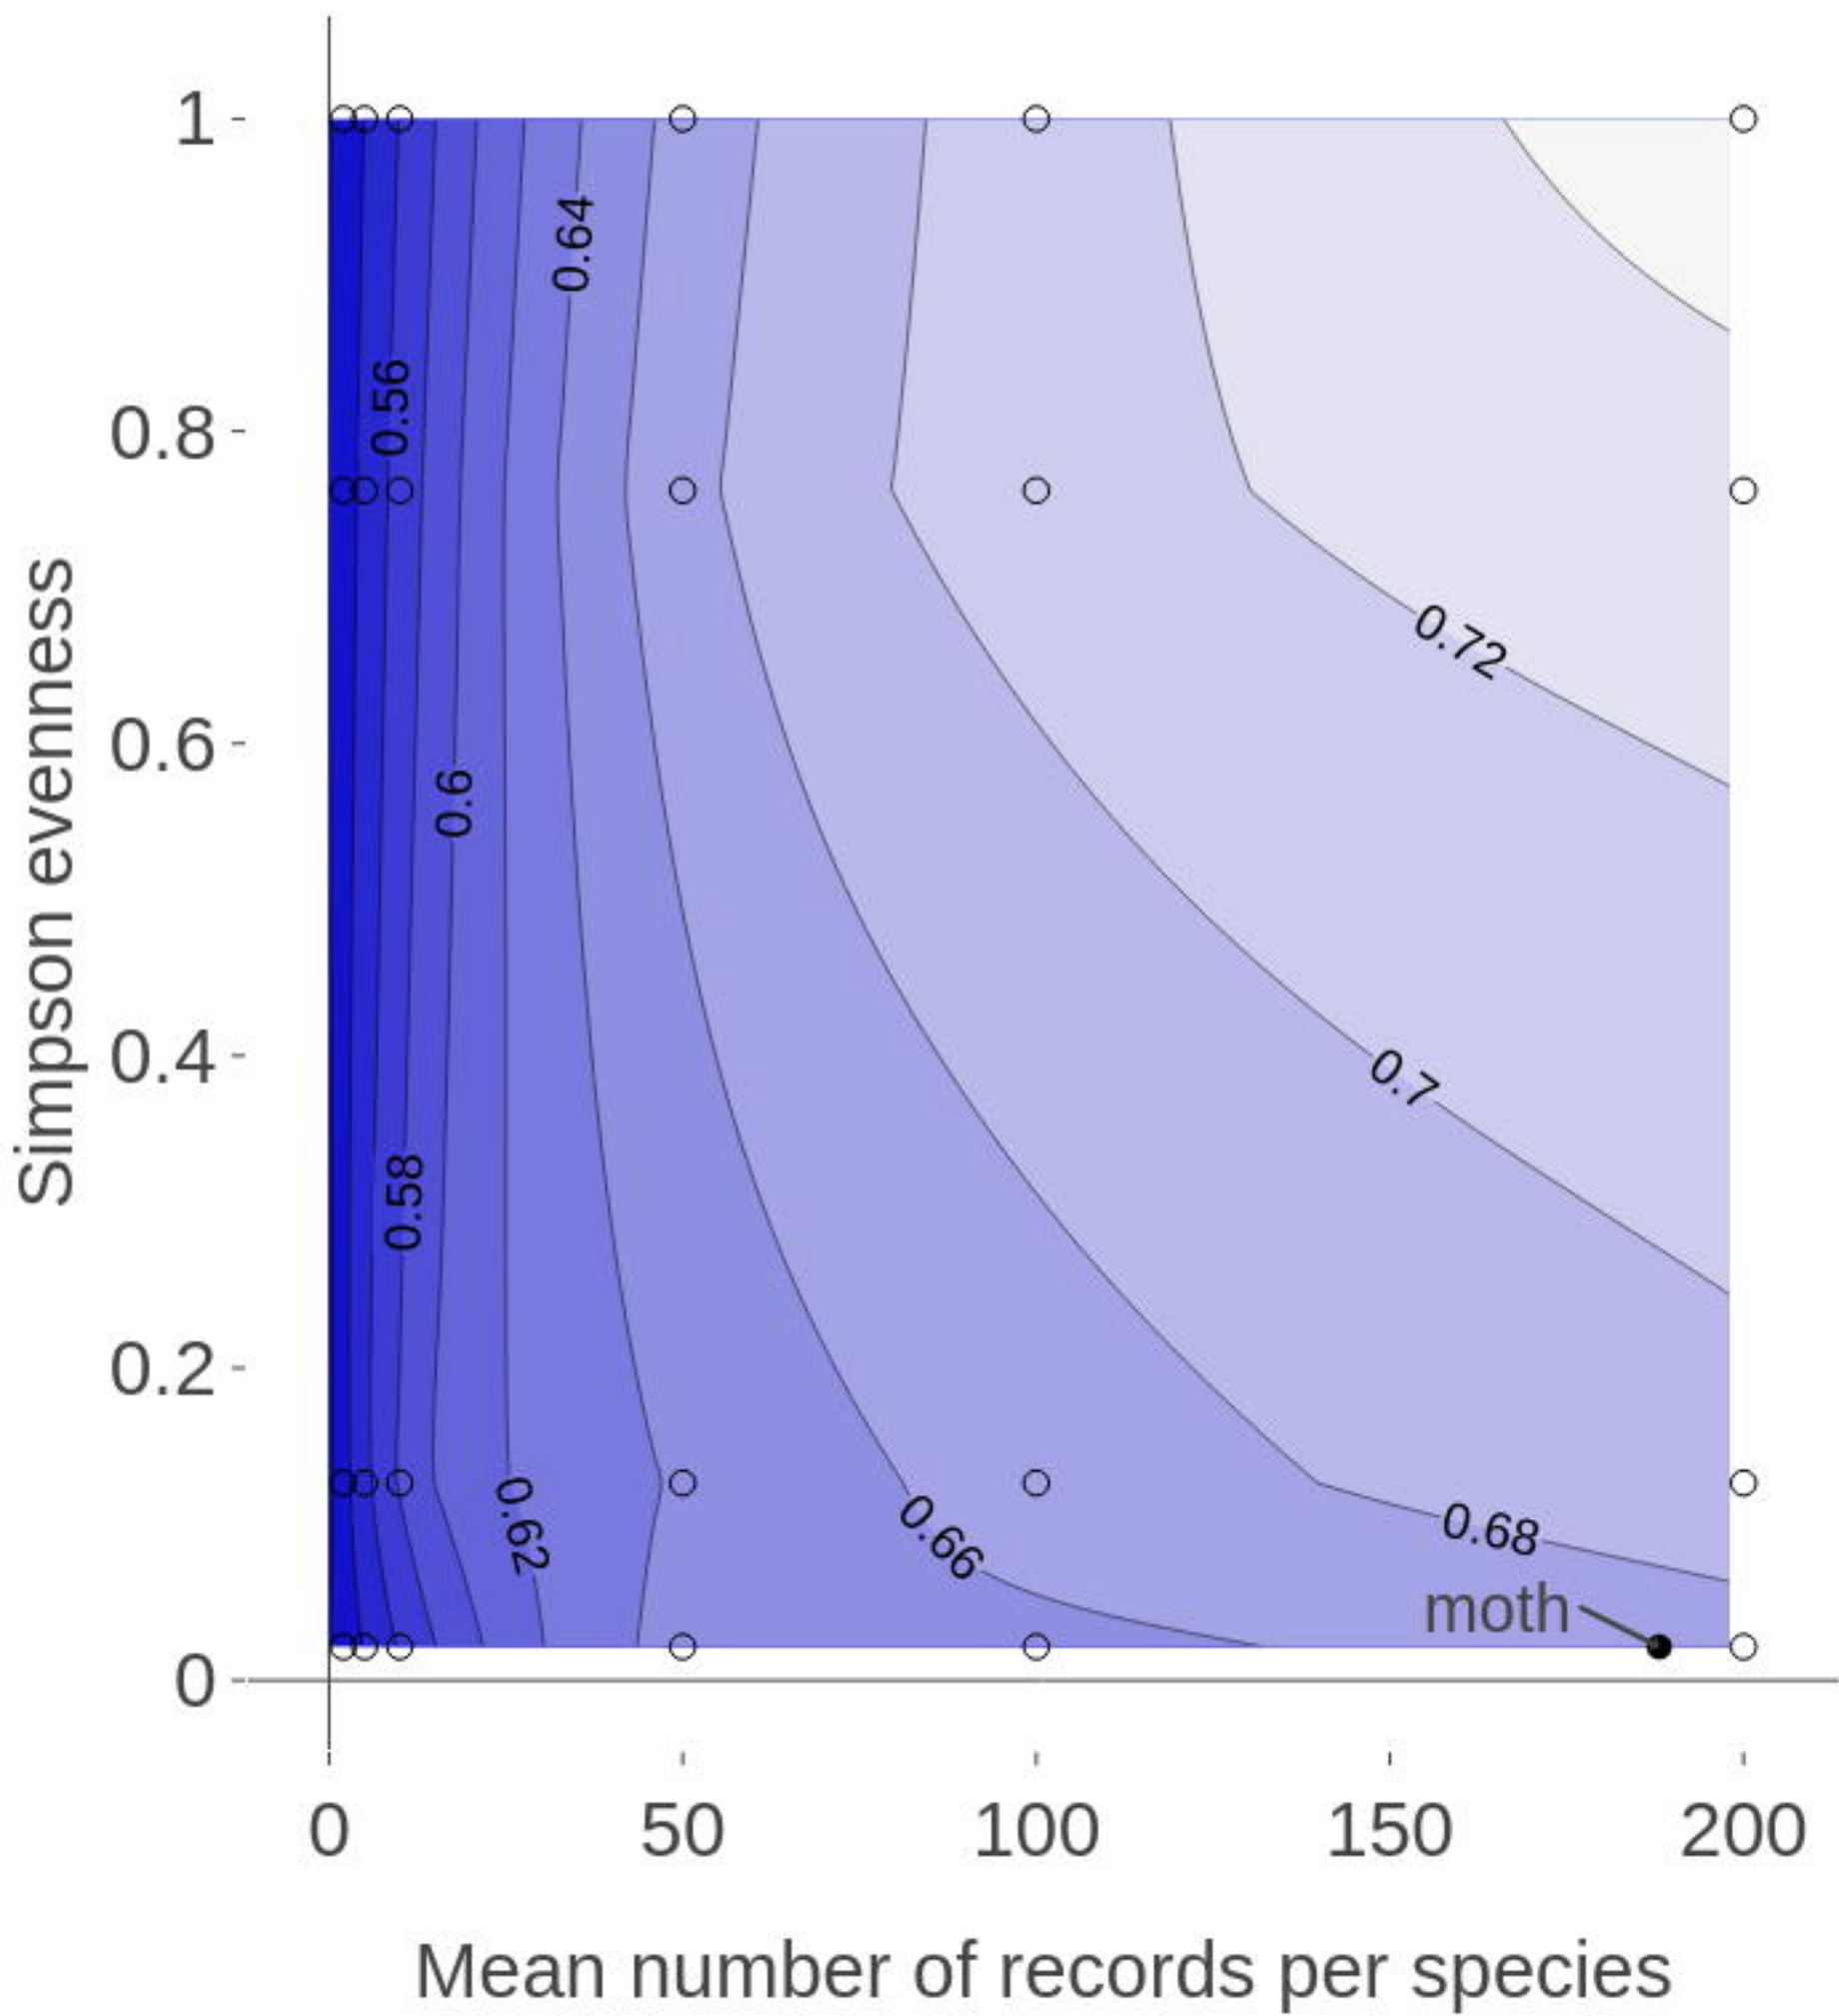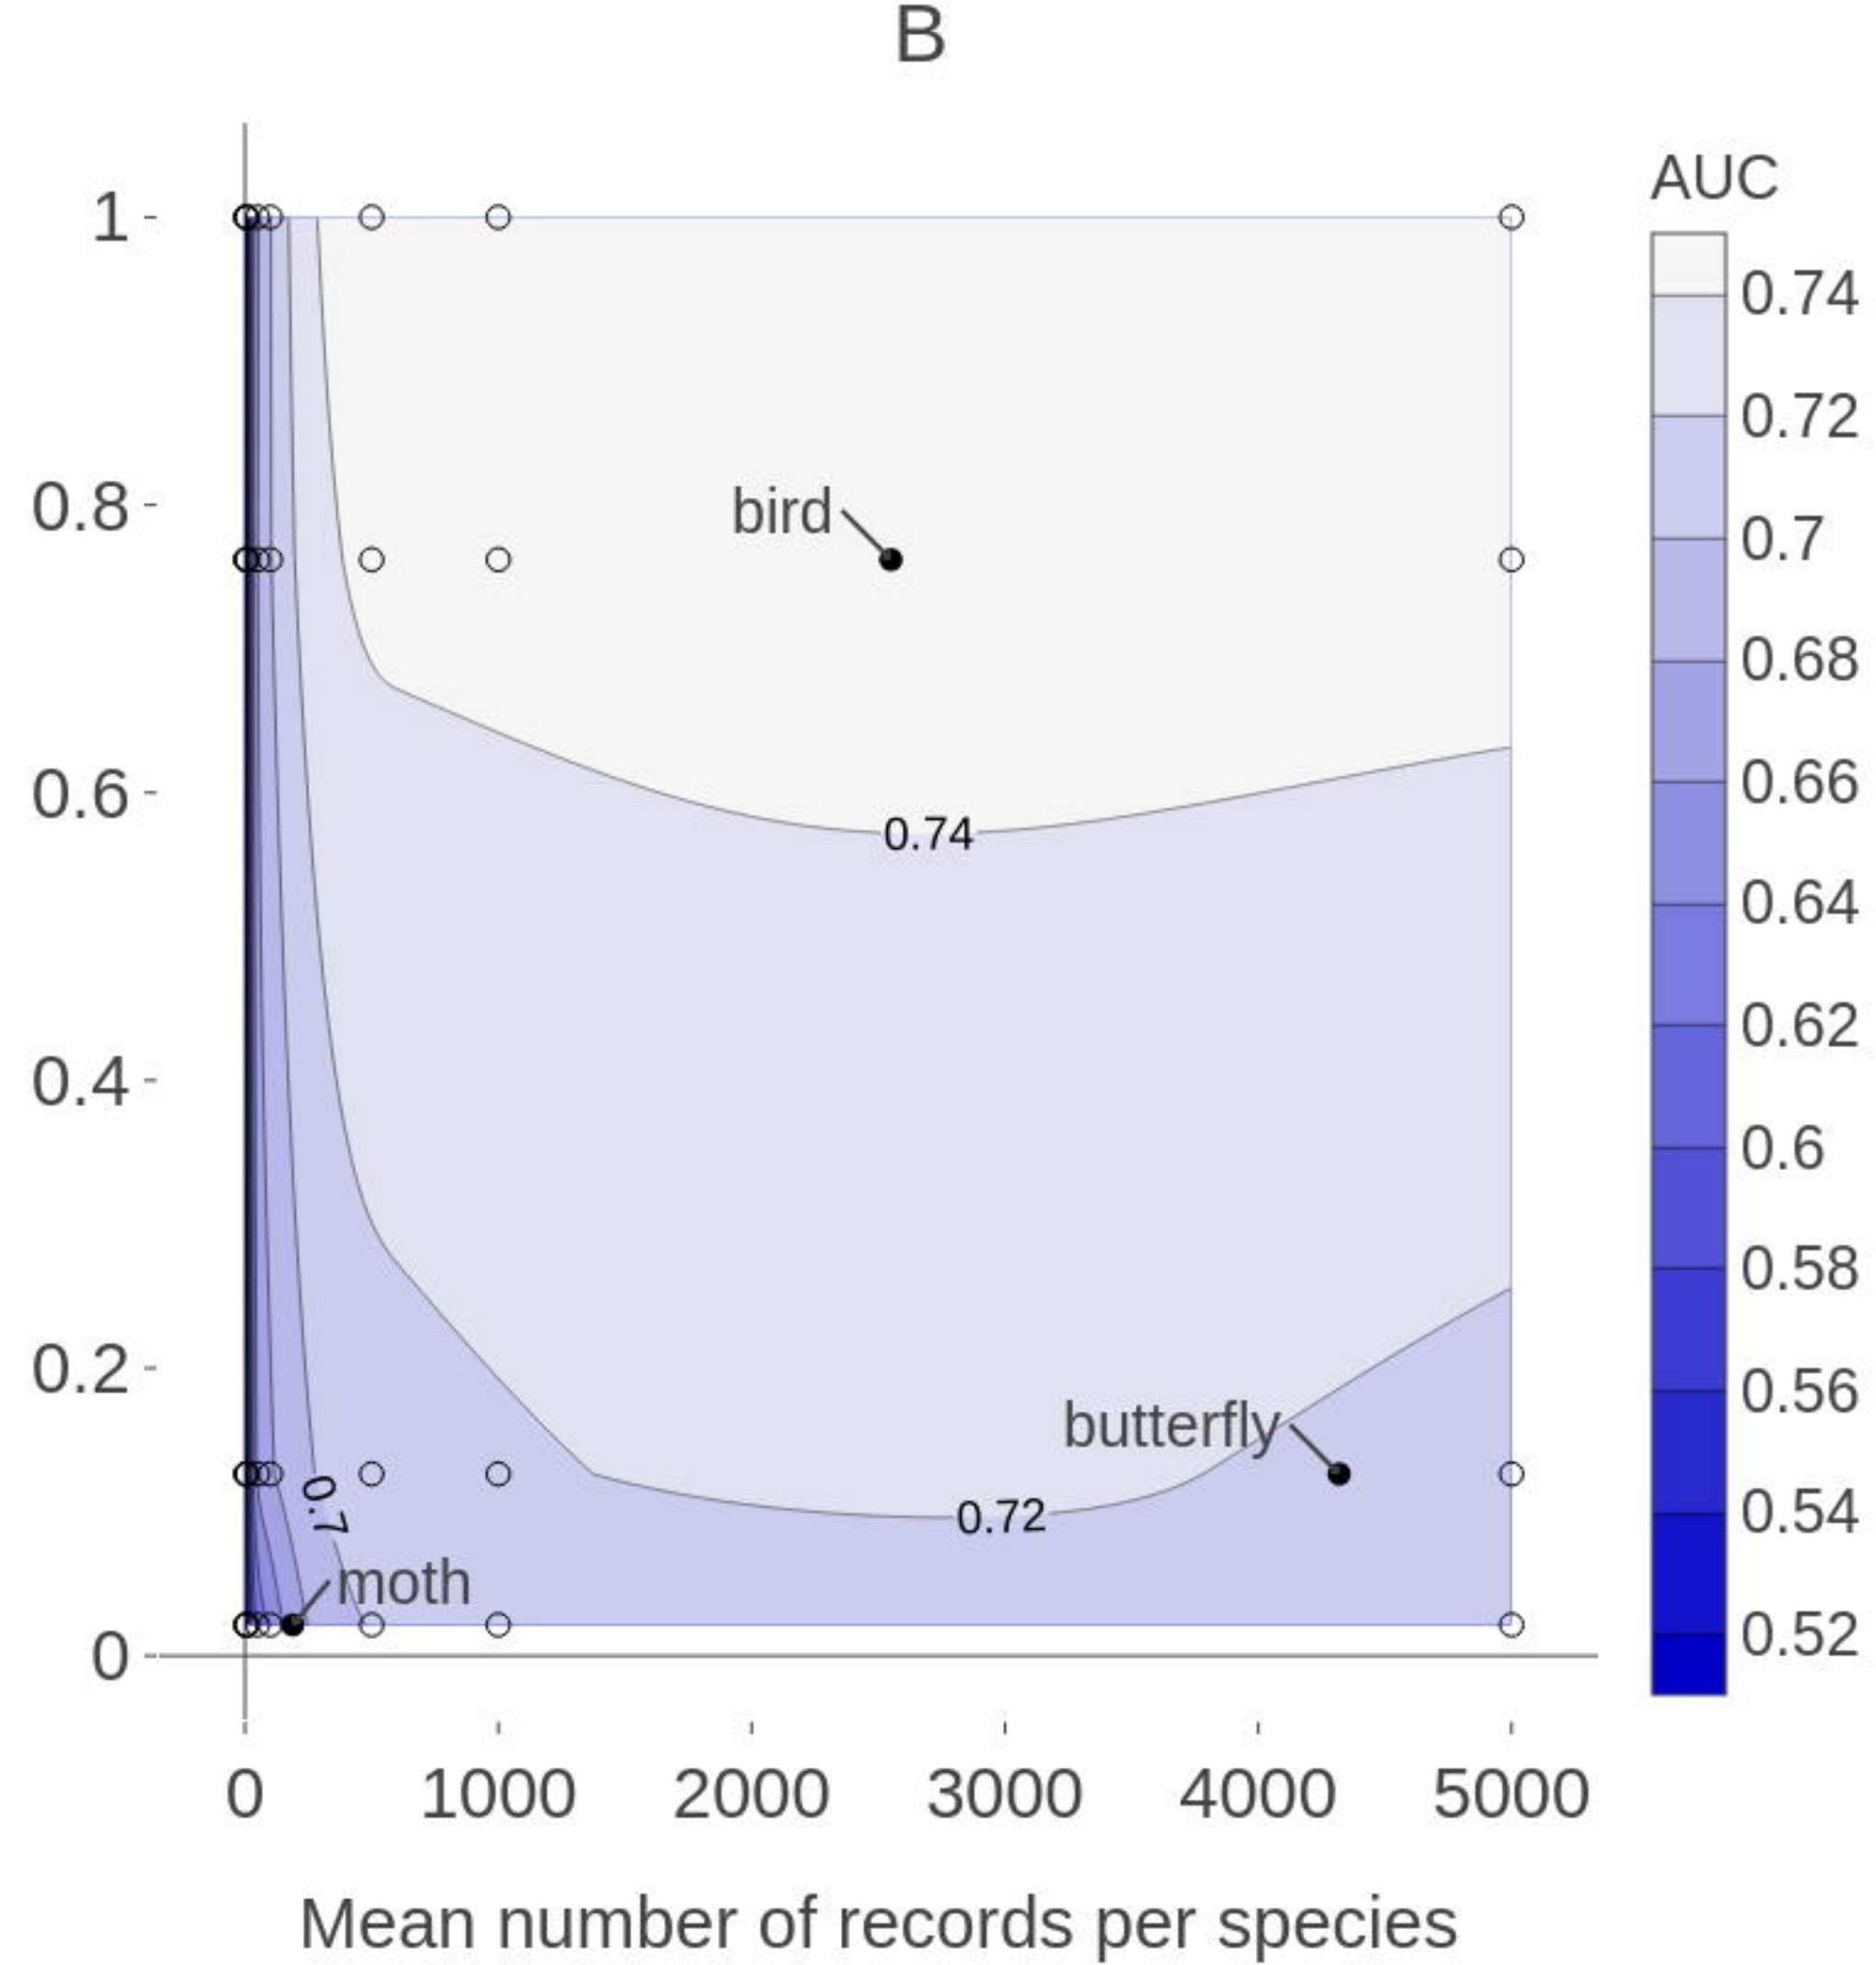

Source: https://www.biorxiv.org/content/biorxiv/early/2020/05/27/2020.05.24.113415.full.pdf
